# Supplementary material for: The Devastating Rice Blast Airborne Pathogen Magnaporthe oryzae—A Review on Genes Studied with Mutant Analysis
Source: MDPI journal article supplement (doi:10.3390/pathogens12030379), 2023-02-26
Supplement: s1 [file s1]

**Supplementary Table S1: Summary of genes from *M. oryzae* that have been studied using mutant analysis.**

**(a) Genes mainly related to fungal development.**

| Gene Code | Fungal Reference Strain                                                   | Mutant Name   | Gene Full Name/<br>Encoding Protein          | Main Functions                                                                  | Mutant Type              | Mutant Phenotypes |                                |                                       |           | Tested Hosts                                                        | Reference |
|-----------|---------------------------------------------------------------------------|---------------|----------------------------------------------|---------------------------------------------------------------------------------|--------------------------|-------------------|--------------------------------|---------------------------------------|-----------|---------------------------------------------------------------------|-----------|
|           |                                                                           |               |                                              |                                                                                 |                          | Hyphal Growth     | Conidia Growth/<br>Development | Appressoria Formation/<br>Development | Virulence |                                                                     |           |
| MGG_03538 | Guy11                                                                     | <i>mgwc-1</i> | white collar-1                               | a blue light receptor                                                           | deletion                 | +                 | +                              | NA                                    | NA        |                                                                     | [39]      |
| MGG_03977 | M2942 Y34                                                                 | <i>cos1</i>   | conidiospore stalk-less1                     | conidiation                                                                     | T-DNA insertion deletion | +                 | +                              | NA                                    | -         | barley and rice leaves<br>rice axils                                | [40]      |
| MGG_04317 | JL0910 (isolated and purified from <i>Oryza sativa</i> cultivar Jijing88) | <i>zfc3</i>   | C3HC type zinc-finger domain protein         | conidia production, mitochondrial ATP-dependent Lon protease (MAP1) interaction | deletion                 | +                 | +                              | NA                                    | -         | rice seedlings (cv. JJ88) and barley (cv. Golden Promise)           | [41]      |
| MGG_03620 | 70-15                                                                     | <i>st1</i>    | hexose transporter family protein            | conidiation and mycelial melanisation                                           | deletion                 | +                 | +                              | -                                     | -         | barley cotyledons (cv. Nigrate) and rice seedlings (cv. Shin No. 2) | [42]      |
| MGG_14966 | Guy11                                                                     | <i>cda1</i>   | chitin deacetylases                          | chitin deacetylation (hyphae in colony interiors)                               | deletion                 | +                 | -                              | -                                     | -         | rice seedlings (cv. CO39)                                           | [43]      |
| MGG_08774 | Guy11                                                                     | <i>cda4</i>   | chitin deacetylases                          | chitin deacetylation (hyphae at colony margins)                                 | deletion                 | +                 | -                              | -                                     | -         | rice seedlings (cv. CO39)                                           | [43]      |
| MGG_04118 | S6                                                                        | <i>fas1</i>   | fatty acid synthase beta subunit dehydratase | lipid biosynthesis, conidiogenesis and appressorium formation                   | deletion                 | +                 | +                              | +                                     | NA        | NA                                                                  | [44]      |

|           |                                                                               |                         |                                          |                                                    |          |    |   |   |    |                                    |      |
|-----------|-------------------------------------------------------------------------------|-------------------------|------------------------------------------|----------------------------------------------------|----------|----|---|---|----|------------------------------------|------|
| MGG_07964 | B157                                                                          | <i>laea</i>             | global regulator of secondary metabolism | penicillin G biosynthesis                          | deletion | -  | + | - | -  | rice seedlings (cv. HR12)          | [45] |
| MGG_14872 | Guy11                                                                         | <i>capn1</i>            | calpains-related gene                    | conidiation                                        | deletion | -  | + | - | -  | rice and barley seedlings          | [46] |
| MGG_03703 | P131                                                                          | <i>spa2</i>             | spindle pole antigen gene                | polar cell growth of vegetative hyphae and conidia | deletion | +  | + | - | -  | rice (cv. LTH) and barley (cv. C9) | [47] |
| MGG_05336 | Guy11                                                                         | <i>mtp1</i>             | type III integral transmembrane protein  | conidiation and conidial germination               | deletion | NA | + | + | -  | rice seedlings                     | [48] |
| MGG_01076 | P2                                                                            | <i>hda1</i>             | class II histone deacetylases HDAC genes | vegetative growth and conidiation                  | deletion | +  | + | - | NA | NA                                 | [49] |
|           | Guy11 (MAT1-1), TH16 (MAT1-1), 2539 (MAT1-2), 70-15 (MAT1-2) and TH3 (MAT1-2) | <i>mat 1-1, mat 1-2</i> | mating type genes                        | sexual development - asci and ascospores formation | deletion | -  | - | - | -  | rice seedlings                     | [50] |

**(b) Autophagy-related genes.**

| Gene code | Fungal Reference Strain | Mutant Name | Gene Full Name/<br>Encoding Protein      | Main Functions                                                     | Mutant Type | Mutant Phenotypes |                                |                                       |           | Tested Hosts                                            | Reference |
|-----------|-------------------------|-------------|------------------------------------------|--------------------------------------------------------------------|-------------|-------------------|--------------------------------|---------------------------------------|-----------|---------------------------------------------------------|-----------|
|           |                         |             |                                          |                                                                    |             | Hyphal Growth     | Conidia Growth/<br>Development | Appressoria Formation/<br>Development | Virulence |                                                         |           |
| MGG_06393 | Guy11                   | <i>atg1</i> | serine/threonine protein kinase          | appressoria turgor and pathogenesis, initiation of autophagy       | deletion    | +                 | +                              | -                                     | +         | barley (H. vulgare cv. ZJ-8) rice (O. sativa cv. CO-39) | [52]      |
| MGG_16734 | Guy11                   | <i>atg2</i> | peripheral membrane protein              | recycling                                                          | deletion    | NA                | NA                             | +                                     | +         | rice seedling (cultivar CO-39)                          | [51]      |
| MGG_02959 | Guy11                   | <i>atg3</i> | autophagy-related protein                | autophagosome formation                                            | deletion    | NA                | NA                             | +                                     | +         | rice seedling (cultivar CO-39)                          | [51]      |
| MGG_03580 | Guy11                   | <i>atg4</i> | cysteine protease                        | cleavage of the carboxyl terminus of Atg8, autophagosome formation | deletion    | +                 | +                              | +                                     | +         | rice seedling (cultivar CO-39)                          | [55]      |
| MGG_09262 | Guy11                   | <i>atg5</i> | autophagy-related protein                | cell differentiation and pathogenesis, autophagosome formation     | deletion    | NA                | +                              | +                                     | +         | rice seedling (cultivar CO-39)                          | [58]      |
| MGG_03694 | Guy11                   | <i>atg6</i> | autophagy-related protein                | nucleation                                                         | deletion    | NA                | +                              | +                                     | +         | rice seedling (cultivar CO-39)                          | [51]      |
| MGG_07297 | Guy11                   | <i>atg7</i> | E1 family of ubiquitin-activating enzyme | autophagosome formation                                            | deletion    | NA                | NA                             | +                                     | +         | rice seedling (cultivar CO-39)                          | [51]      |

|           |       |              |                                                |                                                                      |          |    |    |   |   |                                |      |
|-----------|-------|--------------|------------------------------------------------|----------------------------------------------------------------------|----------|----|----|---|---|--------------------------------|------|
| MGG_01062 | Guy11 | <i>atg8</i>  | autophagy-related protein                      | autophagosome formation                                              | deletion | +  | +  | + | + | rice seedling (cultivar CO-39) | [13] |
| MGG_09559 | Guy11 | <i>atg9</i>  | phospholipid scramblase, transmembrane protein | autophagy and cytoplasm to vacuole transport (Cvt) vesicle formation | deletion | +  | +  | + | + | rice seedling (cultivar CO-39) | [57] |
| MGG_14737 | Guy11 | <i>atg10</i> | E2-like conjugating enzyme                     | autophagosome formation                                              | deletion | NA | NA | + | + | rice seedling (cultivar CO-39) | [51] |
| MGG_04486 | Guy11 | <i>atg11</i> | selective autophagy-related protein            | pexophagy                                                            | deletion | NA | -  | - | - | rice seedling (cultivar CO-39) | [51] |
| MGG_00598 | Guy11 | <i>atg12</i> | ubiquitin-like modifier                        | autophagosome formation                                              | deletion | NA | NA | + | + | rice seedling (cultivar CO-39) | [51] |
| MGG_00454 | Guy11 | <i>atg13</i> | phosphorylated protein                         | initiation of autophagy                                              | deletion | NA | NA | + | + | rice seedling (cultivar CO-39) | [51] |
| MGG_03698 | Guy11 | <i>atg14</i> | autophagy-related protein                      | autophagy and conidial autophagic cell death                         | deletion | +  | +  | + | + | rice seedling (cultivar CO-39) | [56] |
| MGG_12828 | Guy11 | <i>atg15</i> | lipase                                         | recycling                                                            | deletion | NA | NA | + | + | rice seedling (cultivar CO-39) | [51] |
| MGG_05255 | Guy11 | <i>atg16</i> | autophagy-related protein                      | pre-autophagosomal structure formation                               | deletion | NA | NA | + | + | rice seedling (cultivar CO-39) | [51] |
| MGG_07667 | Guy11 | <i>atg17</i> | autophagy-related protein                      | initiation of autophagy                                              | deletion | NA | NA | + | + | rice seedling (cultivar CO-39) | [51] |

|           |       |              |                                                                                          |                                                           |          |    |    |    |    |                                         |      |
|-----------|-------|--------------|------------------------------------------------------------------------------------------|-----------------------------------------------------------|----------|----|----|----|----|-----------------------------------------|------|
| MGG_03139 | Guy11 | <i>atg18</i> | phosphatidylinositol<br>3,5-bisphosphate-<br>binding protein                             | recycling                                                 | deletion | NA | NA | +  | +  | rice<br>seedling<br>(cultivar<br>CO-39) | [51] |
| MGG_03638 | Guy11 | <i>atg24</i> | selective<br>autophagy-related<br>protein                                                | sorting nexin                                             | deletion | NA | -  | -  | -  | rice<br>seedling<br>(cultivar<br>CO-39) | [51] |
| MGG_03459 | Guy11 | <i>atg26</i> | selective<br>autophagy-related<br>protein, UDP-<br>glucose:sterol<br>glucosyltransferase | synthesis of<br>sterol<br>glucoside<br>membrane lipids    | deletion | NA | -  | -  | -  | rice<br>seedling<br>(cultivar<br>CO-39) | [51] |
| MGG_02386 | Guy11 | <i>atg27</i> | selective<br>autophagy-related<br>protein                                                | autophagy                                                 | deletion | NA | -  | -  | -  | rice<br>seedling<br>(cultivar<br>CO-39) | [51] |
| MGG_08061 | Guy11 | <i>atg28</i> | selective<br>autophagy-related<br>protein                                                | degradation of<br>peroxisomes                             | deletion | NA | -  | -  | -  | rice<br>seedling<br>(cultivar<br>CO-39) | [51] |
| MGG_02790 | Guy11 | <i>atg29</i> | selective<br>autophagy-related<br>protein                                                | autophagosome<br>formation                                | deletion | NA | -  | -  | -  | rice<br>seedling<br>(cultivar<br>CO-39) | [51] |
| MGG_01096 | B157  | <i>sgal</i>  | vacuolar<br>glucoamylase<br>(sporulation<br>specific<br>GlucAmylase)                     | glycogen<br>autophagy for<br>asexual<br>differentiation   | deletion | -  | +  | NA | -  | barley<br>leaf<br>explants              | [54] |
| MGG_03026 | Guy11 | <i>nima</i>  | protein kinase                                                                           | mitosis                                                   | deletion | +  | +  | +  | NA | NA                                      | [13] |
| MGG_09497 | Guy11 | <i>opy2</i>  | overproduction-<br>induced<br>pheromone-resistant<br>protein 2                           | fungal<br>development,<br>pathogenicity,<br>and autophagy | deletion | +  | +  | +  | +  | rice<br>seedlings<br>(cv. CO-<br>39)    | [59] |

|           |                    |              |                                        |                                                                                                                                    |          |    |   |    |   |                                                                                |      |
|-----------|--------------------|--------------|----------------------------------------|------------------------------------------------------------------------------------------------------------------------------------|----------|----|---|----|---|--------------------------------------------------------------------------------|------|
| MGG_08097 | Guy11              | <i>yck1</i>  | casein kinase                          | development,<br>autophagy, and<br>virulence                                                                                        | deletion | +  | + | +  | + | rice<br>seedling                                                               | [60] |
| MGG_05379 | Guy11              | <i>vps9</i>  | VSP9 domain-<br>containing protein     | autophagy and<br>endocytosis,<br>fungal<br>development and<br>pathogenicity                                                        | deletion | +  | + | +  | + | rice<br>seedling<br>(cv.<br>CO39)                                              | [61] |
| MGG_06375 | Guy11              | <i>hat1</i>  | histone<br>acetyltransferase           | fungal<br>development<br>and<br>pathogenicity                                                                                      | deletion | +  | + | +  | + | rice<br>seedling<br>(cultivar<br>CO-39)                                        | [62] |
| MGG_03677 | RFP-ATG8<br>strain | <i>gcn5</i>  | histone<br>acetyltransferase           | autophagy,<br>conidiation,<br>pathogenicity                                                                                        | deletion | NA | + | NA | + | barley<br>leaf<br>explants                                                     | [63] |
| MGG_05089 | $\Delta$ ku70      | <i>vps35</i> | cargo-recognition<br>complex component | fungal<br>development and<br>pathogenicity,<br>conidial<br>autophagic cell<br>death regulation,<br>biogenesis of<br>autophagosomes | deletion | +  | + | +  | + | rice<br>seedling<br>(cv.CO-<br>39) and<br>barley<br>(cv.<br>Golden<br>Promise) | [64] |
| MGG_04830 | $\Delta$ ku70      | <i>vps26</i> | cargo-recognition<br>complex component | fungal<br>conidiation and<br>pathogenicity                                                                                         | deletion | NA | + | NA | + | rice<br>seedling<br>(cv.CO-<br>39) and<br>barley<br>(cv.<br>Golden<br>Promise) | [64] |
| MGG_02524 | $\Delta$ ku70      | <i>vps29</i> | cargo-recognition<br>complex component | fungal<br>conidiation and<br>pathogenicity                                                                                         | deletion | NA | + | NA | + | rice<br>seedling<br>(cv.CO-<br>39) and<br>barley<br>(cv.<br>Golden<br>Promise) | [64] |

|           |       |              |                                                                                         |                                                                                           |          |   |   |   |   |                                       |      |
|-----------|-------|--------------|-----------------------------------------------------------------------------------------|-------------------------------------------------------------------------------------------|----------|---|---|---|---|---------------------------------------|------|
| MGG_00455 | Guy11 | <i>hse1</i>  | component of the endosomal sorting complexes required for transport 0                   | fungal development, pathogenicity, and autophagy                                          | deletion | + | + | + | + | rice (cv. CO-39) and barley           | [65] |
| MGG_04958 | Guy11 | <i>vps27</i> | component of the endosomal sorting complexes required for transport 0                   | fungal development, pathogenicity, and autophagy                                          | deletion | + | + | + | + | rice (cv. CO-39) and barley           | [65] |
| MGG_04174 | Guy11 | <i>snf7</i>  | core protein of endosomal sorting complex required for transport (ESCRT)-III subcomplex | fungal development and pathogenicity, cell wall integrity, endocytosis, autophagy         | deletion | + | + | + | + | rice and barley leaves                | [66] |
| MGG_01765 | Guy11 | <i>ist1</i>  | subunit of ESCRT-III                                                                    | fungal development and pathogenicity, autophagy                                           | deletion | + | + | + | + | rice seedlings (cv. CO-39) and barley | [65] |
| MGG_09205 | Guy11 | <i>hrd1</i>  | ER-associated degradation (ERAD) ubiquitin ligase                                       | fungal development and pathogenicity, lipid metabolism and conidial autophagic cell death | deletion | + | + | + | + | rice (cv. CO-39)                      | [67] |
| MGG_06444 | Guy11 | <i>der1</i>  | ER-associated degradation (ERAD) ubiquitin ligase                                       | fungal development and pathogenicity, lipid metabolism and conidial autophagic cell death | deletion | + | + | + | + | rice (cv. CO-39)                      | [67] |
| MGG_04421 | Guy11 | <i>snt2</i>  | DNA-binding domain SaNT deacetylation of H3                                             | autophagy and pathogenicity, regulation of MoATG6, 15, 16, and 22 expressions             | deletion | + | + | + | + | rice leaves and rice leaf sheath      | [68] |

|           |                |              |                                                                             |                                                                            |          |   |   |   |   |                                                |      |
|-----------|----------------|--------------|-----------------------------------------------------------------------------|----------------------------------------------------------------------------|----------|---|---|---|---|------------------------------------------------|------|
| MGG_04584 | Guy11          | <i>hmt1</i>  | arginine methyltransferase gene                                             | formation of autophagosomes, fungal development and pathogenicity          | deletion | + | + | + | + | rice seedlings (cv CO-39) and barley seedlings | [69] |
| MGG_07187 | P131 and S1528 | <i>glt1</i>  | glutamate synthase                                                          | glutamate homeostasis, autophagy, fungal development and pathogenicity     | deletion | - | + | + | + | rice seedling (cv. LTH) and barley (cv. E9)    | [70] |
| MGG_11211 | Guy11          | <i>vast1</i> | VAD1 Analog of StAR-related lipid transfer (VAST) domain-containing protein | fungal development and pathogenicity, membrane tension, sterol homeostasis | deletion | + | + | + | + | rice (cv. CO-39)                               | [71] |



(c) Genes encoding effectors.

| Gene Code | Fungal Reference Strain | Mutant Name | Gene Full Name/<br>Encoding Protein                                        | Main Functions                                                          | Mutant Type | Mutant Phenotypes |                                |                                       |           | Secretion Signal | Tested Hosts                                                                           | Reference |
|-----------|-------------------------|-------------|----------------------------------------------------------------------------|-------------------------------------------------------------------------|-------------|-------------------|--------------------------------|---------------------------------------|-----------|------------------|----------------------------------------------------------------------------------------|-----------|
|           |                         |             |                                                                            |                                                                         |             | Hyphal Growth     | Conidia Growth/<br>Development | Appressoria Formation/<br>Development | Virulence |                  |                                                                                        |           |
| MGG_10010 | Ina86-137               | <i>rbf1</i> | required-for-focal-BIC-formation 1, glycine-rich secretion protein         | biotrophic interfacial complex (BIC) formation and fungal pathogenicity | deletion    | -                 | -                              | -                                     | +         | Yes              | rice                                                                                   | [78]      |
| MGG_10276 | KJ201                   | <i>htr1</i> | nuclear effector, C2H2 zinc finger protein                                 | fungal pathogenicity                                                    | deletion    | -                 | -                              | -                                     | +         | Yes              | rice (cv. Nakdong)                                                                     | [79]      |
| MGG_10280 | KJ201                   | <i>htr2</i> | nuclear effector, C2H2 zinc finger protein                                 | fungal pathogenicity                                                    | deletion    | -                 | -                              | -                                     | +         | Yes              | rice (cv. Nakdong)                                                                     | [79]      |
| MGG_02848 | Ina72                   | <i>mc69</i> | secreted protein, harboring a putative N-terminal secretion signal peptide | appressorial penetration and pathogenicity                              | deletion    | -                 | -                              | +                                     | +         | Yes              | barley cotyledons (cv. Nigrate) and rice seedlings (cv. Shin No. 2 or cv. Sasanishiki) | [80]      |
| MGG_06648 | 70-15                   | <i>lhs1</i> | ER chaperone, members of the heat shock protein 70 family                  | effector secretion, fungal development and pathogenicity                | deletion    | +                 | +                              | +                                     | +         | Yes              | rice (compatible cultivar Nakdongbyeo) plants                                          | [81]      |
| MGG_10315 | Guy11                   | <i>mpg1</i> | hydrophobin, small secreted protein                                        | fungal development and pathogenicity, hydrophobin formation             | deletion    | NA                | +                              | +                                     | +         | Yes              | rice seedlings (cv. CO39)                                                              | [82]      |

|           |       |              |                                              |                                                                       |          |    |    |    |   |     |                                  |      |
|-----------|-------|--------------|----------------------------------------------|-----------------------------------------------------------------------|----------|----|----|----|---|-----|----------------------------------|------|
| MGG_01173 | 70-15 | <i>mhp1</i>  | class II hydrophobin, small secreted protein | fungal development and pathogenicity, hydrophobin formation           | deletion | +  | +  | +  | + | Yes | rice seedlings (cv. Nakdong)     | [83] |
| MGG_05344 | 70-15 | <i>msp1</i>  | small secreted protein, snodprot1            | fungal virulence                                                      | deletion | -  | NA | -  | + | Yes | rice and barley plants           | [84] |
| MGG_15022 | KJ201 | <i>hrip1</i> | secreted effector                            | fungal pathogenicity                                                  | deletion | -  | -  | -  | + | Yes | rice (cv. Nipponbare)            | [86] |
| MGG_09378 | INA72 | <i>heg13</i> | hypothetical effector gene13                 | suppress NLP-induced cell death, fungal penetration and pathogenicity | deletion | NA | NA | +  | + | Yes | barley primary leaves (cv. Vada) | [87] |
| MGG_01149 | INA72 | <i>heg16</i> | hypothetical effector gene16                 | mesophyll colonization, fungal pathogenicity                          | deletion | NA | NA | NA | + | Yes | barley primary leaves (cv. Vada) | [87] |
| MGG_08054 | Guy11 | <i>chial</i> | secreted protein, chitinase                  | fungal development and pathogenicity                                  | deletion | +  | +  | +  | + | Yes | rice seedling                    | [89] |
| MGG_10097 | Guy11 | <i>slp1</i>  | secreted LysM protein1                       | sequesters chitin oligosaccharides, fungal pathogenicity              | deletion | -  | -  | -  | + | Yes | rice (cv. CO-39)                 | [90] |
| MGG_06069 | Guy11 | <i>aa91</i>  | auxiliary activity family 9 protein          | appressorium development and virulence                                | deletion | NA | NA | +  | + | Yes | rice (cv. CO39)                  | [91] |
| MGG_05023 | KJ201 | <i>cda7</i>  | chitin deacetylase                           | fungal pathogenicity                                                  | deletion | -  | -  | -  | + | Yes | rice                             | [92] |

|           |                 |                                |                                   |                                              |          |   |   |   |   |    |                                                        |      |
|-----------|-----------------|--------------------------------|-----------------------------------|----------------------------------------------|----------|---|---|---|---|----|--------------------------------------------------------|------|
| MGG_08010 | P131            | <i>alg3</i>                    | $\alpha$ -1,3-mannosyltransferase | fungal pathogenicity                         | deletion | - | - | - | + | No | rice (cv. LTH) seedlings and barley seedlings (cv. E9) | [93] |
| MGG_03644 | Guy11           | <i>sec61<math>\beta</math></i> | beta subunit of Sec61             | fungal development and pathogenicity         | deletion | + | + | + | + | NA | rice (cv CO-39)                                        | [94] |
| MGG_06521 | Guy11 and JS153 | <i>syn8</i>                    | syntaxin protein                  | fungal development and pathogenicity         | deletion | + | + | + | + | No | rice (cv. CO-39) and barley                            | [95] |
| MGG_11243 | Guy11           | <i>vrp1</i>                    | verprolin protein                 | fungal asexual development and pathogenicity | deletion | + | + | + | + | NA | rice (cv. CO-39)                                       | [96] |

| (d) Genes involved in different signaling pathways. |                         |             |                                                |                                      |                              |                   |                                |                                       |           |                              |           |
|-----------------------------------------------------|-------------------------|-------------|------------------------------------------------|--------------------------------------|------------------------------|-------------------|--------------------------------|---------------------------------------|-----------|------------------------------|-----------|
| Gene code                                           | Fungal Reference Strain | Mutant Name | Gene Full Name/<br>Encoding Protein            | Main Functions                       | Mutant Type                  | Mutant Phenotypes |                                |                                       |           | Tested Hosts                 | Reference |
|                                                     |                         |             |                                                |                                      |                              | Hyphal Growth     | Conidia Growth/<br>Development | Appressoria Formation/<br>Development | Virulence |                              |           |
| G-protein                                           |                         |             |                                                |                                      |                              |                   |                                |                                       |           |                              |           |
| MGG_01818                                           | 70-6<br>70-15           | <i>maga</i> | G protein $\alpha$ subunit gene                | NA                                   | deletion                     | -                 | -                              | -                                     | -         | rice (cv. S-201)             | [98]      |
| MGG_00365                                           | 70-6<br>70-15           | <i>magb</i> | G protein $\alpha$ subunit gene                | fungal development and pathogenicity | deletion                     | +                 | +                              | +                                     | +         | rice (cv. S-201)             | [98]      |
| MGG_04204                                           | 70-6<br>70-15           | <i>magc</i> | G protein $\alpha$ subunit gene                | conidia formation                    | deletion                     | -                 | +                              | -                                     | -         | rice (cv. S-201)             | [98]      |
| MGG_05201                                           | Guy11                   | <i>mgbl</i> | G protein $\beta$ subunit gene                 | fungal development and pathogenicity | deletion                     | -                 | +                              | +                                     | +         | rice (cv. CO39) and barley   | [99]      |
| MGG_10193                                           | Guy11                   | <i>mggl</i> | G $\gamma$ subunit gene                        | fungal development and virulence     | T-DNA insertion and deletion | -                 | +                              | +                                     | +         | rice (cv. CO-39)             | [100]     |
| G protein signaling pathways                        |                         |             |                                                |                                      |                              |                   |                                |                                       |           |                              |           |
| MGG_14517                                           | Guy11                   | <i>rgs1</i> | regulator of G-protein signaling (RGS) protein | fungal development and pathogenicity | deletion                     | +                 | +                              | +                                     | +         | rice leaves (cultivar CO-39) | [103-105] |
| MGG_03146                                           | Guy11                   | <i>rgs2</i> | regulator of G-protein signaling (RGS) protein | fungal development                   | deletion                     | -                 | +                              | +                                     | -         | rice leaves (cultivar CO-39) | [104]     |

|                                                                                                         |                    |              |                                                        |                                                   |          |    |    |   |   |                                                        |       |
|---------------------------------------------------------------------------------------------------------|--------------------|--------------|--------------------------------------------------------|---------------------------------------------------|----------|----|----|---|---|--------------------------------------------------------|-------|
| MGG_03726                                                                                               | Guy11              | <i>rgs3</i>  | regulator of G-protein signaling (RGS) protein         | fungal development and pathogenicity              | deletion | -  | +  | + | + | rice leaves (cultivar CO-39)                           | [104] |
| MGG_00990                                                                                               | Guy11              | <i>rgs4</i>  | regulator of G-protein signaling (RGS) protein         | fungal development and pathogenicity              | deletion | +  | +  | + | + | rice leaves (cultivar CO-39)                           | [104] |
| MGG_08735                                                                                               | Guy11              | <i>rgs5</i>  | regulator of G-protein signaling (RGS) protein         | -                                                 | deletion | -  | -  | - | - | rice leaves (cultivar CO-39)                           | [104] |
| MGG_09618                                                                                               | Guy11              | <i>rgs6</i>  | regulator of G-protein signaling (RGS) protein         | fungal development                                | deletion | +  | -  | + | - | rice leaves (cultivar CO-39)                           | [104] |
| MGG_11693                                                                                               | Guy11              | <i>rgs7</i>  | regulator of G-protein signaling (RGS) protein         | fungal development and pathogenicity              | deletion | -  | -  | + | + | rice leaves (cultivar CO-39)                           | [104] |
| MGG_13926                                                                                               | Guy11              | <i>rgs8</i>  | regulator of G-protein signaling (RGS) protein         | -                                                 | deletion | -  | -  | - | - | rice leaves (cultivar CO-39)                           | [104] |
| MGG_04719                                                                                               | Guy11              | <i>mip11</i> | scaffolding protein, MoRgs7-interacting protein        | fungal development and pathogenicity              | deletion | +  | +  | + | + | rice (cv. CO39)                                        | [106] |
| <b>The high-affinity cyclic adenosine monophosphate-dependent protein kinase A (cAMP/PKA) signaling</b> |                    |              |                                                        |                                                   |          |    |    |   |   |                                                        |       |
| MGG_06368                                                                                               | 70-15, 70-6, Guy11 | <i>cpka</i>  | catalytic subunit of the cAMP-dependent protein kinase | appressorium penetration and fungal pathogenicity | deletion | NA | NA | + | + | rice (cv. S-201 and cv. CO39) and barley (cv. Bonanza) | [108] |

|           |       |             |                                          |                                                                 |                              |   |   |   |   |                                                  |       |
|-----------|-------|-------------|------------------------------------------|-----------------------------------------------------------------|------------------------------|---|---|---|---|--------------------------------------------------|-------|
| MGG_07335 | B157  | <i>rpka</i> | regulatory subunit of cAMP/PKA           | fungal development and pathogenicity                            | deletion                     | + | + | + | + | rice (cv.CO39) and barley (cv. Express)          | [109] |
| MGG_05664 | B157  | <i>pdeh</i> | high-affinity phosphodiesterase          | fungal development and pathogenicity, regulation of cAMP levels | deletion                     | + | + | + | + | rice (cv. Tongil and CO39)                       | [110] |
| MGG_07707 | B157  | <i>pdel</i> | low-affinity cAMP phosphodiesterase      | minor role                                                      | deletion                     | + | + | + | + | rice (cv. Tongil and CO39)                       | [110] |
| MGG_09700 | Guy11 | <i>yvh1</i> | protein phosphatase                      | fungal development and pathogenicity                            | deletion                     | + | + | + | + | rice (cv. CO39)                                  | [111] |
| MGG_09898 | 70-15 | <i>mac1</i> | adenylate cyclase, membrane-bound enzyme | fungal development and pathogenicity                            | deletion                     | + | + | + | + | rice (cv.S-201)                                  | [112] |
| MGG_01722 | Ku80  | <i>cap1</i> | adenylate cyclase-associated protein     | fungal development and pathogenicity                            | deletion                     | + | + | + | + | rice seedlings (cv. CO-39)                       | [113] |
| MGG_04708 | Guy11 | <i>som1</i> | pathogenicity-related gene               | fungal development and pathogenicity                            | T-DNA insertion and deletion | + | + | + | + | barley (cv. Golden Promise) and (rice cv. CO-39) | [115] |

|                     |                 |             |                                                                         |                                                                    |                              |    |   |   |   |                                                                       |            |
|---------------------|-----------------|-------------|-------------------------------------------------------------------------|--------------------------------------------------------------------|------------------------------|----|---|---|---|-----------------------------------------------------------------------|------------|
| MGG_00692           | Guy11 and 70-15 | <i>stul</i> | APSES transcription factor                                              | fungal development and pathogenicity                               | deletion                     | -  | + | + | + | rice (cv. LTH)                                                        | [114, 115] |
| MGG_11346           | Guy11           | <i>cdf1</i> | cAMP-dependent transcription factor gene                                | fungal development and pathogenicity                               | T-DNA insertion and deletion | +  | + | + | + | barley (cv. Golden Promise) and rice (cv. CO-39)                      | [115]      |
| MGG_00063           | Guy11           | <i>agl1</i> | glycogen amyloglucosidase                                               | glycogen mobilisation and fungal pathogenicity                     | deletion                     | NA | - | - | + | rice seedlings (cultivar CO-39) and barley seedlings (Golden Promise) | [116]      |
| MGG_01819           | Guy11           | <i>gph1</i> | glycogen phosphorylase                                                  | glycogen mobilisation and fungal pathogenicity                     | deletion                     | NA | - | - | + | rice seedlings (cultivar CO-39) and barley seedlings (Golden Promise) | [116]      |
| <b>MAPK cascade</b> |                 |             |                                                                         |                                                                    |                              |    |   |   |   |                                                                       |            |
| MGG_09565           | Guy11           | <i>pmk1</i> | pathogenicity MAP-kinase 1, the mitogen-activated protein kinase (MAPK) | appressorium formation and fungal pathogenicity                    | deletion                     | -  | + | + | + | rice (cv. CO39) and barley (cv. Golden Promise)                       | [117]      |
| MGG_04943           | Guy11           | <i>mps1</i> | mitogen-activated protein kinase (MAPK)                                 | appressorium penetration and fungal virulence, cell wall integrity | deletion                     | +  | + | + | + | rice (cv. CO39)                                                       | [118]      |

|           |       |              |                                                                                 |                                                                                    |                              |   |   |   |   |                                                       |       |
|-----------|-------|--------------|---------------------------------------------------------------------------------|------------------------------------------------------------------------------------|------------------------------|---|---|---|---|-------------------------------------------------------|-------|
| MGG_01822 | TH3   | <i>osm1</i>  | mitogen-activated protein kinase (MAPK)                                         | osmotic sensitivity, accumulation of the compatible solute arabinol                | deletion                     | - | - | + | - | rice (cv. CO39)                                       | [119] |
| MGG_00501 | Guy11 | <i>msn2</i>  | transcriptional activator with the typical C2H2 zinc-finger DNA-binding domains | fungal development and pathogenicity                                               | deletion                     | + | + | + | + | rice (cv. CO-39) and barley (cv. Four-arrris)         | [120] |
| MGG_14847 | 70-15 | <i>mst11</i> | MAPKKK (MST11-MST7-PMK1 cascade)                                                | fungal development and pathogenicity                                               | deletion                     | - | + | + | + | rice (cv. Nipponbare) and barley (cv. Golden Promise) | [121] |
| MGG_00800 | 70-15 | <i>mst7</i>  | MAPKK (MST11-MST7-PMK1 cascade)                                                 | fungal development and pathogenicity                                               | deletion                     | - | + | + | + | rice (cv. Nipponbare) and barley (cv. Golden Promise) | [122] |
| MGG_04236 | Guy11 | <i>trx2</i>  | thioredoxin gene                                                                | fungal development and pathogenicity                                               | deletion                     | + | + | + | + | rice seedlings (cv. CO-39)                            | [122] |
| MGG_00883 | KJ201 | <i>mck1</i>  | MAPKKK (MCK1-MKK1-MPS1 cascade)                                                 | fungal development and pathogenicity, cell wall integrity                          | T-DNA insertion and deletion | + | + | + | + | rice seedlings (cv. Nagdong)                          | [123] |
| MGG_06482 | Guy11 | <i>mkk1</i>  | MAPKK (MCK1-MKK1-MPS1 cascade)                                                  | fungal development and pathogenicity, cell wall integrity, osmotic stress response | deletion                     | + | + | + | + | rice (cv. Nipponbare) and barley (cv. Golden Promise) | [124] |



|           |             |              |                                                                                    |                                                              |                              |   |   |   |   |                                                       |       |
|-----------|-------------|--------------|------------------------------------------------------------------------------------|--------------------------------------------------------------|------------------------------|---|---|---|---|-------------------------------------------------------|-------|
| MGG_12821 | Guy11       | <i>mst20</i> | p21-activated kinase (PAK) kinase                                                  | conidiation, redundant function                              | deletion                     | + | + | - | - | rice (cv. CO39) and barley (cv. Golden Promise)       | [125] |
| MGG_06320 | Guy11       | <i>chm1</i>  | p21-activated kinase (PAK) kinase                                                  | appressorium formation and penetration, fungal pathogenicity | deletion                     | + | + | + | + | rice (cv. CO39) and barley (cv. Golden Promise)       | [125] |
| MGG_04100 | Guy11       | <i>sep1</i>  | Mitotic Exit Network (MEN) kinase                                                  | fungal development and pathogenicity                         | deletion                     | + | + | + | + | rice seedlings (cv. CO39)                             | [126] |
| MGG_02757 | Guy11       | <i>dbf2</i>  | MEN kinase pathway component                                                       | fungal development and pathogenicity                         | deletion                     | + | + | + | + | rice seedlings (cv. CO39)                             | [126] |
| MGG_03151 | Guy11       | <i>mob1</i>  | MEN kinase pathway component                                                       | fungal development and pathogenicity                         | deletion                     | + | + | + | + | rice seedlings (cv. CO39)                             | [126] |
| MGG_12958 | Guy11&70-15 | <i>mst12</i> | Cys2-His2 (C2H2) zinc finger protein                                               | fungal pathogenicity                                         | deletion                     | - | - | - | + | barley and rice (cv.CO-39)                            | [128] |
| MGG_01285 | Guy11       | <i>tpc1</i>  | transcription factor for polarity control 1, Zn(II)2Cys6 transcriptional regulator | fungal development and pathogenicity                         | deletion and T-DNA insertion | + | + | + | + | rice leaves and roots                                 | [129] |
| MGG_06971 | Ku80        | <i>sfl1</i>  | transcription factor                                                               | fungal conidiation and pathogenicity, heat tolerance         | deletion                     | - | + | - | + | rice (cv. Nipponbare) and barley (cv. Golden Promise) | [130] |

|                                                   |                 |             |                                                 |                                                       |                           |   |   |   |   |                                                                |       |
|---------------------------------------------------|-----------------|-------------|-------------------------------------------------|-------------------------------------------------------|---------------------------|---|---|---|---|----------------------------------------------------------------|-------|
| MGG_12337                                         | Guy11           | <i>gas1</i> | gEgh16 homologs expressed in appressorium stage | appressorial penetration and fungal pathogenicity     | deletion                  | - | - | + | + | rice (cv. CO39)                                                | [131] |
| MGG_04201                                         | Guy11           | <i>gas2</i> | gEgh16 homologs expressed in appressorium stage | appressorial penetration and fungal pathogenicity     | deletion                  | - | - | + | + | rice (cv. CO39)                                                | [131] |
| MGG_08600                                         | 70-15           | <i>pic5</i> | PMK1-interacting clone                          | appressorium differentiation and fungal pathogenicity | deletion                  | + | + | + | + | rice (cv. Nipponbare) and barley (cv. Golden Promise)          | [132] |
| MGG_01204                                         | Guy11 and 70-15 | <i>migl</i> | MADS-box transcription factor                   | fungal development and pathogenicity                  | deletion                  | - | + | + | + | rice (cv. cv. Nipponbare) and barley (cv. Golden Promise)      | [133] |
| MGG_09869                                         | Guy11           | <i>swi6</i> | APSES family transcription factor               | fungal development and pathogenicity                  | deletion                  | + | + | + | + | rice (cv. CO-39)                                               | [134] |
| MGG_12122                                         | Ku80            | <i>gsk1</i> | glycogen synthase kinase                        | fungal development and pathogenicity                  | deletion                  | + | + | + | + | barley seedlings (cv. CDC Silky) and rice seedlings (cv. CO39) | [135] |
| MGG_08850                                         | Guy11           | <i>gti1</i> | GTI1 transcription factor                       | cell wall integrity, conidiation, and plant infection | deletion                  | + | + | + | + | rice seedlings (cv. CO-39)                                     | [136] |
| <b>Monomeric GTPase modules (Ras superfamily)</b> |                 |             |                                                 |                                                       |                           |   |   |   |   |                                                                |       |
| MGG_09499                                         | 70-15           | <i>ras1</i> | GTP-binding protein                             | minor role in conidiation                             | deletion and transformant | - | + | - | - | rice (cv. CO39 and Nipponbare)                                 | [139] |

|           |                 |              |                                      |                                                                               |                                                     |   |   |   |   |                                                          |       |
|-----------|-----------------|--------------|--------------------------------------|-------------------------------------------------------------------------------|-----------------------------------------------------|---|---|---|---|----------------------------------------------------------|-------|
| MGG_06154 | 70-15           | <i>ras2</i>  | GTP-binding protein                  | fungal development and pathogenicity                                          | deletion and transformant (yeast gap repair method) | + | + | + | + | rice (cv. CO39 and Nipponbare)                           | [139] |
| MGG_03846 | Guy11           | <i>smo1</i>  | Ras GTPase-activating protein        | fungal development and pathogenicity                                          | deletion                                            | + | + | + | + | rice (cv.CO-39)                                          | [140] |
| MGG_01287 | P131            | <i>ram1</i>  | farnesyltransferase $\beta$ -subunit | fungal development and pathogenicity, regulating localization of RAS proteins | deletion                                            | + | + | + | + | rice seedlings (cv. LTH) and barley leaves (cv. E9)      | [141] |
| MGG_08255 | 70-15           | <i>ral2</i>  | kelch domain-containing protein      | fungal development and pathogenicity                                          | deletion                                            | + | + | + | + | rice (cv. CO39)                                          | [142] |
| MGG_02731 | 70-15 and Guy11 | <i>rac1</i>  | small GTPase, Rho-family GTPase      | fungal development and pathogenicity                                          | deletion                                            | + | + | + | + | rice and barley (cv. Jinchang 1316) seedlings            | [143] |
| MGG_00466 | CP987           | <i>cdc42</i> | small GTPase, Rho-family GTPase      | fungal development and pathogenicity                                          | deletion                                            | - | + | + | + | rice (cv. CO39) and barley (cv. Jinchang 1316) seedlings | [144] |
| MGG_02457 | KJ201           | <i>rho2</i>  | small GTPase, Rho-family GTPase      | appressorium development and pathogenicity                                    | deletion                                            | - | - | + | + | rice (cv. Nakdongbyeo)                                   | [145] |

|           |                                    |             |                                                    |                                                 |          |   |   |   |   |                                                        |       |
|-----------|------------------------------------|-------------|----------------------------------------------------|-------------------------------------------------|----------|---|---|---|---|--------------------------------------------------------|-------|
| MGG_10323 | 70-15                              | <i>rho3</i> | small GTPase,<br>Rho-family<br>GTPase              | fungal<br>development<br>and<br>pathogenicity   | deletion | - | + | + | + | rice (cv.<br>CO39)                                     | [146] |
| MGG_04186 | $\Delta$ ku70 and<br>$\Delta$ ku80 | <i>rga1</i> | Rho GTPase<br>activating protein<br>(Rho GAP) gene | fungal<br>development                           | deletion | - | + | + | - | rice and barley<br>(cv. Jinchang<br>1316)<br>seedlings | [147] |
| MGG_06390 | $\Delta$ ku70 and<br>$\Delta$ ku80 | <i>rga2</i> | Rho GAP gene                                       | redundant<br>function                           | deletion | - | + | - | - | rice and barley<br>(cv. Jinchang<br>1316)<br>seedlings | [147] |
| MGG_03048 | $\Delta$ ku70 and<br>$\Delta$ ku80 | <i>rga3</i> | Rho GAP gene                                       | -                                               | deletion | - | - | - | - | rice and barley<br>(cv. Jinchang<br>1316)<br>seedlings | [147] |
| MGG_09531 | $\Delta$ ku70 and<br>$\Delta$ ku80 | <i>rga4</i> | Rho GAP gene                                       | fungal<br>development,<br>redundant<br>function | deletion | + | + | + | - | rice and barley<br>(cv. Jinchang<br>1316)<br>seedlings | [147] |
| MGG_09303 | $\Delta$ ku70 and<br>$\Delta$ ku80 | <i>rga5</i> | Rho GAP gene                                       | redundant<br>function                           | deletion | - | + | - | - | rice and barley<br>(cv. Jinchang<br>1316)<br>seedlings | [147] |
| MGG_09275 | $\Delta$ ku70 and<br>$\Delta$ ku80 | <i>rga6</i> | Rho GAP gene                                       | -                                               | deletion | - | - | - | - | rice and barley<br>(cv. Jinchang<br>1316)<br>seedlings | [147] |
| MGG_04006 | $\Delta$ ku70 and<br>$\Delta$ ku80 | <i>rga7</i> | Rho GAP gene                                       | redundant<br>function                           | deletion | - | + | - | - | rice and barley<br>(cv. Jinchang<br>1316)<br>seedlings | [147] |

|           |                                 |             |                                                           |                                                                          |                                                         |   |    |    |   |                                               |       |
|-----------|---------------------------------|-------------|-----------------------------------------------------------|--------------------------------------------------------------------------|---------------------------------------------------------|---|----|----|---|-----------------------------------------------|-------|
| MGG_04377 | $\Delta ku70$ and $\Delta ku80$ | <i>lrg1</i> | Rho GTPase activating protein (Rho GAP) gene              | fungus development and pathogenicity                                     | deletion                                                | + | +  | +  | + | rice and barley (cv. Jinchang 1316) seedlings | [147] |
| MGG_04438 | Guy11                           | <i>arf6</i> | ADP ribosylation factor (Arf) small GTPase family protein | fungus growth and conidiation                                            | deletion                                                | + | +  | -  | - | rice (cv. CO-39)                              | [148] |
| MGG_01574 | Guy11                           | <i>arl1</i> | ADP ribosylation factor (Arf) small GTPase family protein | vegetative growth, normal vesicle trafficking, fungus pathogenicity      | deletion                                                | + | -  | +  | + | rice (cv. CO-39)                              | [149] |
| MGG_08859 | Guy11                           | <i>arl3</i> | ADP ribosylation factor (Arf) small GTPase family protein | vegetative growth                                                        | deletion                                                | + | -  | -  | - | rice (cv. CO-39)                              | [149] |
| MGG_04976 | Guy11                           | <i>arl8</i> | ADP ribosylation factor (Arf) small GTPase family protein | -                                                                        | deletion                                                | - | -  | -  | - | rice (cv. CO-39)                              | [149] |
| MGG_10676 | Guy11                           | <i>cin4</i> | ADP ribosylation factor (Arf) small GTPase family protein | fungus growth, conidiation and pathogenicity, normal vesicle trafficking | deletion                                                | + | +  | +  | + | rice (cv. CO-39)                              | [149] |
| MGG_06362 | Guy11                           | <i>sar1</i> | ADP ribosylation factor (Arf) small GTPase family protein | fungus growth                                                            | $\Delta Moarf1/CPR$ mutant (nitrate reductase promoter) | + | NA | NA | - | rice (cv. CO-39)                              | [149] |

|                                                                                          |       |             |                                                           |                                                                                    |                                                 |   |    |    |   |                                                 |       |
|------------------------------------------------------------------------------------------|-------|-------------|-----------------------------------------------------------|------------------------------------------------------------------------------------|-------------------------------------------------|---|----|----|---|-------------------------------------------------|-------|
| MGG_12887                                                                                | Guy11 | <i>arf1</i> | ADP ribosylation factor (Arf) small GTPase family protein | fungal growth                                                                      | ΔMosar1/CPR mutant (nitrate reductase promoter) | + | NA | NA | - | rice (cv. CO-39)                                | [149] |
| MGG_00852                                                                                | Guy11 | <i>gga1</i> | Arf-interacting Gga protein                               | fungal development and pathogenicity                                               | deletion                                        | - | +  | NA | + | rice (cv. CO-39)                                | [149] |
| MGG_01472                                                                                | Guy11 | <i>glo3</i> | ADP ribosylation factor (Arf) GAP protein                 | fungal development and pathogenicity                                               | deletion                                        | + | +  | +  | + | rice (cv. CO-39)                                | [150] |
| MGG_08144                                                                                | Guy11 | <i>ypt7</i> | Rab GTPase                                                | fungal development and pathogenicity                                               | deletion                                        | + | +  | NA | + | barley (cv. Golden Promise) and rice (cv. CO39) | [151] |
| <b>Target of Rapamycin (TOR) signaling pathway (Negative-acting regulatory pathways)</b> |       |             |                                                           |                                                                                    |                                                 |   |    |    |   |                                                 |       |
| MGG_06050                                                                                | Guy11 | <i>asd4</i> | GATA transcription factor                                 | intracellular glutamine level regulation, TOR inhibition of appressorium formation | deletion                                        | + | -  | +  | - | rice (cv. CO39)                                 | [153] |
| MGG_03911                                                                                | Guy11 | <i>ppe1</i> | serine/threonine protein phosphatase                      | fungal development and pathogenicity, cell wall integrity                          | deletion                                        | + | +  | -  | + | rice (cv. CO39)                                 | [154] |
| MGG_12709                                                                                | Guy11 | <i>sap1</i> | MoPpe1 associated protein                                 | fungal pathogenicity, cell wall integrity                                          | deletion                                        | + | +  | +  | + | rice (cv. CO39)                                 | [154] |

|                               |       |              |                                                                   |                                                                                                                          |                              |   |    |   |   |                           |       |
|-------------------------------|-------|--------------|-------------------------------------------------------------------|--------------------------------------------------------------------------------------------------------------------------|------------------------------|---|----|---|---|---------------------------|-------|
| MGG_00478                     | Guy11 | <i>tip41</i> | Tap42-interacting protein 41, type 2A phosphatase activator TIP41 | fungal development and pathogenicity, autophagosome formation and nonspecific autophagy                                  | deletion                     | + | +  | - | + | rice (cv. CO39)           | [155] |
| MGG_11241                     | B157  | <i>whi2</i>  | protein with a SKP1/BTB/POZ domain                                | fungal development and pathogenicity                                                                                     | T-DNA insertion and deletion | + | +  | + | + | rice (cv. CO-39)          | [156] |
| MGG_03646                     | B157  | <i>psr1</i>  | phosphatase                                                       | fungal development and pathogenicity                                                                                     | deletion                     | + | +  | + | + | rice (cv. CO-39)          | [156] |
| MGG_08120                     | Guy11 | <i>impl</i>  | integral membrane protein                                         | biotrophic interface longevity, membrane trafficking, V-ATPase assembly, organelle acidification and autophagy induction | T-DNA insertion and deletion | + | NA | + | + | rice (cv. CO39)           | [157] |
| <b>Ubiquitination cascade</b> |       |              |                                                                   |                                                                                                                          |                              |   |    |   |   |                           |       |
| MGG_01282                     | 70-15 | NA           | polyubiquitin encoding gene                                       | fungal development and pathogenicity                                                                                     | deletion                     | + | +  | + | + | barley and rice seedlings | [159] |

|           |       |              |                                                                        |                                                                         |          |   |   |   |   |                                   |       |
|-----------|-------|--------------|------------------------------------------------------------------------|-------------------------------------------------------------------------|----------|---|---|---|---|-----------------------------------|-------|
| MGG_01756 | Guy11 | <i>rad6</i>  | ubiquitin-conjugating enzyme (E2)                                      | fungus development and pathogenicity                                    | deletion | + | + | + | + | rice (cv. CO39) and barley leaves | [160] |
| MGG_00139 | Guy11 | <i>bre1</i>  | ubiquitin ligase (E3)                                                  | fungus development and pathogenicity                                    | deletion | + | + | - | + | rice (cv. CO39) and barley leaves | [160] |
| MGG_13171 | Guy11 | <i>ubr1</i>  | ubiquitin ligase (E3)                                                  | fungus development and pathogenicity, conidial adhesion and germination | deletion | - | + | + | + | rice (cv. CO39) and barley leaves | [160] |
| MGG_04175 | Guy11 | <i>rad18</i> | ubiquitin ligase (E3)                                                  | minor roles                                                             | deletion | - | + | - | - | rice (cv. CO39) and barley leaves | [160] |
| MGG_04978 | B157  | <i>skp1</i>  | component of the SCF (Skp1-Cullin 1-F-box) E3 ubiquitin ligase complex | fungus development and pathogenicity                                    | deletion | + | + | + | + | rice (cv. CO39) and barley leaves | [161] |
| MGG_13065 | Guy11 | <i>grr1</i>  | F-box protein, specific adaptors to E3 ubiquitin ligases               | fungus development and virulence                                        | deletion | + | + | + | + | rice (cv. CO39) and barley leaves | [162] |



|           |       |              |                                                        |                                                                              |                              |   |   |   |   |                                                                                            |       |
|-----------|-------|--------------|--------------------------------------------------------|------------------------------------------------------------------------------|------------------------------|---|---|---|---|--------------------------------------------------------------------------------------------|-------|
| MGG_12163 | KJ201 | <i>cue1</i>  | the ubiquitin system component cue                     | fungus conidiation and pathogenicity, translocation of cytoplasmic effectors | deletion                     | - | + | - | + | rice (cv. Nakdongbyeo)                                                                     | [163] |
| MGG_00768 | Guy11 | <i>fbx15</i> | F-box protein                                          | fungus development and pathogenicity, circadian rhythm regulation            | deletion                     | + | + | + | + | barley leaves (cv. Golden Promise)                                                         | [163] |
| MGG_04957 | Guy11 | <i>ubp4</i>  | deubiquitinating enzyme                                | fungus development and pathogenicity, deubiquitination                       | T-DNA insertion and deletion | + | + | + | + | rice (cv. CO-39) and barley (cv. Golden Promise)                                           | [165] |
| MGG_03527 | Guy11 | <i>ubp8</i>  | deubiquitinating enzyme                                | fungus development and pathogenicity, carbon catabolite repression           | deletion                     | + | + | + | + | rice (cv. CO-39)                                                                           | [166] |
| MGG_05737 | P131  | <i>smt3</i>  | small ubiquitin-like modifier (SUMO) pathway component | fungus development and pathogenicity, stress response                        | deletion                     | + | + | - | + | barley seedlings (Hordeum vulgare cv E9) and rice seedlings (Oryza sativa japonica cv LTH) | [167] |

|           |      |             |                                                     |                                                       |          |   |   |   |   |                                                                                            |       |
|-----------|------|-------------|-----------------------------------------------------|-------------------------------------------------------|----------|---|---|---|---|--------------------------------------------------------------------------------------------|-------|
| MGG_01669 | P131 | <i>aos1</i> | E1-activating enzyme gene, SUMO-activating enzyme   | fungus development and pathogenicity, stress response | deletion | + | + | - | + | barley seedlings (Hordeum vulgare cv E9) and rice seedlings (Oryza sativa japonica cv LTH) | [167] |
| MGG_06733 | P131 | <i>uba2</i> | E1-activating enzyme gene, SUMO-activating enzymes  | fungus development and pathogenicity, stress response | deletion | + | + | - | + | barley seedlings (Hordeum vulgare cv E9) and rice seedlings (Oryza sativa japonica cv LTH) | [167] |
| MGG_00970 | P131 | <i>ubc9</i> | E2 conjugating ligase gene, SUMO-conjugating enzyme | fungus development and pathogenicity, stress response | deletion | + | + | - | + | barley seedlings (Hordeum vulgare cv E9) and rice seedlings (Oryza sativa japonica cv LTH) | [167] |
| MGG_08837 | P131 | <i>siz1</i> | E3 ligase gene, SUMO ligases                        | fungus development and pathogenicity, stress response | deletion | + | + | - | + | barley seedlings (Hordeum vulgare cv E9) and rice seedlings (Oryza sativa japonica cv LTH) | [167] |

(e) Multi-functional genes involved in different aspects of *M. oryzae* biology.

| Gene code                                            | Fungal Reference Strain | Mutant Name | Gene Full Name/ Encoding Protein                                                         | Main Functions                       | Mutant Type | Mutant Phenotypes |                             |                                    |           | Tested Hosts                                             | Reference |
|------------------------------------------------------|-------------------------|-------------|------------------------------------------------------------------------------------------|--------------------------------------|-------------|-------------------|-----------------------------|------------------------------------|-----------|----------------------------------------------------------|-----------|
|                                                      |                         |             |                                                                                          |                                      |             | Hyphal Growth     | Conidia Growth/ Development | Appressoria Formation/ Development | Virulence |                                                          |           |
| Transcription factors (Zn2Cys6 transcription factor) |                         |             |                                                                                          |                                      |             |                   |                             |                                    |           |                                                          |           |
| MGG_17841                                            | 70-15                   | <i>gpf1</i> | Zn2Cys6 transcription factor gene, growth and pathogenicity regulatory factor 1          | fungal development and pathogenicity | deletion    | +                 | +                           | +                                  | +         | barley (Hordeum vulgare) and rice (Oryza sativa cv CO39) | [170]     |
| MGG_15023                                            | 70-15                   | <i>cnf2</i> | Zn2Cys6 transcription factor gene, conidial production negative regulatory factor 2      | fungal development and pathogenicity | deletion    | NA                | +                           | -                                  | +         | barley (Hordeum vulgare) and rice (Oryza sativa cv CO39) | [170]     |
| MGG_07063                                            | 70-15                   | <i>gcc1</i> | Zn2Cys6 transcription factor gene, growth, conidiation and cell wall regulatory factor 1 | fungal development and pathogenicity | deletion    | +                 | +                           | -                                  | +         | barley (Hordeum vulgare) and rice (Oryza sativa cv CO39) | [170]     |

|           |       |             |                                                                                                                                                         |                                               |          |    |   |   |   |                                                                            |       |
|-----------|-------|-------------|---------------------------------------------------------------------------------------------------------------------------------------------------------|-----------------------------------------------|----------|----|---|---|---|----------------------------------------------------------------------------|-------|
| MGG_07149 | 70-15 | <i>gtal</i> | Zn2Cys6<br>transcription factor<br>gene, growth and<br>tolerance to acidic<br>stress regulatory<br>factor 1                                             | fungal<br>development<br>and<br>pathogenicity | deletion | +  | + | - | + | barley<br>(Hordeum<br>vulgare)<br>and rice<br>(Oryza<br>sativa cv<br>CO39) | [170] |
| MGG_02962 | 70-15 | <i>cnfl</i> | Zn2Cys6<br>transcription factor<br>gene, conidial<br>production negative<br>regulatory factor 1                                                         | fungal<br>development<br>and<br>pathogenicity | deletion | NA | + | + | + | barley<br>(Hordeum<br>vulgare)<br>and rice<br>(Oryza<br>sativa cv<br>CO39) | [170] |
| MGG_17623 | 70-15 | <i>pcfl</i> | Zn2Cys6<br>transcription factor<br>gene, pathogenicity<br>and conidiation<br>regulatory factor 1                                                        | fungal<br>development<br>and<br>pathogenicity | deletion | NA | + | + | + | barley<br>(Hordeum<br>vulgare)<br>and rice<br>(Oryza<br>sativa cv<br>CO39) | [170] |
| MGG_05659 | 70-15 | <i>ccal</i> | Zn2Cys6<br>transcription factor<br>gene, conidiation,<br>conidial<br>germination and<br>appressorium<br>formation required<br>transcription factor<br>1 | fungal<br>development<br>and<br>pathogenicity | deletion | NA | + | + | + | barley<br>(Hordeum<br>vulgare)<br>and rice<br>(Oryza<br>sativa cv<br>CO39) | [170] |

|           |       |              |                                                                                                |                                                                           |          |    |   |   |   |                                                                                               |       |
|-----------|-------|--------------|------------------------------------------------------------------------------------------------|---------------------------------------------------------------------------|----------|----|---|---|---|-----------------------------------------------------------------------------------------------|-------|
| MGG_12349 | 70-15 | <i>conx1</i> | Zn2Cys6<br>transcription factor<br>gene, conidiation<br>required<br>transcription factor<br>x1 | fungal<br>development<br>and<br>pathogenicity                             | deletion | NA | + | - | + | barley<br>( <i>Hordeum<br/>vulgare</i> )<br>and rice<br>( <i>Oryza<br/>sativa</i> cv<br>CO39) | [170] |
| MGG_05343 | KJ201 | <i>cod1</i>  | conidiation-related<br>Zn (II)2Cys6<br>transcription factor<br>gene                            | fungal<br>development<br>and<br>pathogenicity                             | deletion | +  | + | + | + | rice<br>seedlings<br>(cv.<br>Nakdongb<br>yeo)                                                 | [169] |
| MGG_09263 | KJ201 | <i>cod2</i>  | conidiation-related<br>Zn (II)2Cys6<br>transcription factor<br>gene                            | fungal<br>conidiation<br>and<br>pathogenicity                             | deletion | -  | + | - | + | rice<br>seedlings<br>(cv.<br>Nakdongb<br>yeo)                                                 | [169] |
| MGG_01553 | Guy11 | <i>leu1</i>  | isopropylmalate<br>isomerase                                                                   | leucine<br>biosynthesis,<br>fungal<br>development<br>and<br>pathogenicity | deletion | +  | + | + | + | rice (cv.<br>CO39) or<br>barley (cv.<br>Golden<br>Promise)<br>leaves                          | [171] |
| MGG_05223 | Guy11 | <i>leu2</i>  | leucine biosynthesis<br>pathway gene                                                           | leucine<br>biosynthesis,<br>fungal<br>development<br>and<br>pathogenicity | deletion | +  | + | + | + | rice (cv.<br>CO39) or<br>barley (cv.<br>JZ-8)                                                 | [171] |
| MGG_00672 | Guy11 | <i>leu3</i>  | a leucine-associated<br>Zn2Cys6-type<br>transcription factor                                   | leucine<br>biosynthesis,<br>fungal<br>development<br>and<br>pathogenicity | deletion | -  | - | + | + | rice (cv.<br>CO39) or<br>barley (cv.<br>JZ-8)                                                 | [171] |

|                                                                            |       |              |                                             |                                                            |          |   |   |    |   |                                      |            |
|----------------------------------------------------------------------------|-------|--------------|---------------------------------------------|------------------------------------------------------------|----------|---|---|----|---|--------------------------------------|------------|
| MGG_13485                                                                  | Guy11 | <i>leu4</i>  | leucine biosynthesis pathway gene           | leucine biosynthesis, fungal development and pathogenicity | deletion | - | + | +  | + | rice (cv. CO39) or barley (cv. JZ-8) | [171]      |
| <b>Transcription factors (Cys2-His2 (C2H2) zinc finger protein family)</b> |       |              |                                             |                                                            |          |   |   |    |   |                                      |            |
| MGG_05287                                                                  | 70-15 | <i>con7</i>  | Cys2-His2 (C2H2) zinc finger protein        | fungal development and pathogenicity                       | deletion | + | + | NA | + | barley and rice (cv.CO-39)           | [172, 175] |
| MGG_02775                                                                  | 70-15 | <i>conx2</i> | Cys2-His2 (C2H2) zinc finger protein        | fungal development and pathogenicity                       | deletion | - | + | NA | + | barley and rice (cv.CO-39)           | [175]      |
| MGG_01017                                                                  | 70-15 | <i>conx3</i> | Cys2-His2 (C2H2) zinc finger protein        | fungal development and pathogenicity                       | deletion | - | + | +  | + | barley and rice (cv.CO-39)           | [175]      |
| MGG_02055                                                                  | 70-15 | <i>conx4</i> | Cys2-His2 (C2H2) zinc finger protein        | conidiation                                                | deletion | - | + | -  | - | barley and rice (cv.CO-39)           | [175]      |
| MGG_07339                                                                  | 70-15 | <i>conx5</i> | Cys2-His2 (C2H2) zinc finger protein        | fungal development and pathogenicity                       | deletion | - | + | -  | + | barley and rice (cv.CO-39)           | [175]      |
| MGG_03133                                                                  | 70-15 | <i>conx6</i> | Cys2-His2 (C2H2) zinc finger protein family | conidiation                                                | deletion | - | + | -  | - | barley and rice (cv.CO-39)           | [175]      |
| MGG_01127                                                                  | 70-15 | <i>conx7</i> | Cys2-His2 (C2H2) zinc finger protein        | conidiation                                                | deletion | - | + | -  | - | barley and rice (cv.CO-39)           | [175]      |

|           |       |               |                                         |                                               |          |   |   |    |   |                                  |       |
|-----------|-------|---------------|-----------------------------------------|-----------------------------------------------|----------|---|---|----|---|----------------------------------|-------|
| MGG_06848 | 70-15 | <i>conx8</i>  | Cys2-His2 (C2H2)<br>zinc finger protein | conidiation                                   | deletion | - | + | -  | - | barley and<br>rice<br>(cv.CO-39) | [175] |
| MGG_06575 | 70-15 | <i>conx9</i>  | Cys2-His2 (C2H2)<br>zinc finger protein | conidiation                                   | deletion | - | + | -  | - | barley and<br>rice<br>(cv.CO-39) | [175] |
| MGG_08493 | 70-15 | <i>conx10</i> | Cys2-His2 (C2H2)<br>zinc finger protein | conidiation                                   | deletion | - | + | -  | - | barley and<br>rice<br>(cv.CO-39) | [175] |
| MGG_03030 | 70-15 | <i>conx11</i> | Cys2-His2 (C2H2)<br>zinc finger protein | conidiation                                   | deletion | - | + | -  | - | barley and<br>rice<br>(cv.CO-39) | [175] |
| MGG_03977 | 70-15 | <i>cos1</i>   | Cys2-His2 (C2H2)<br>zinc finger protein | conidiation                                   | deletion | - | + | NA | - | barley and<br>rice<br>(cv.CO-39) | [175] |
| MGG_10595 | 70-15 | <i>gcf2</i>   | Cys2-His2 (C2H2)<br>zinc finger protein | fungal<br>development<br>and<br>pathogenicity | deletion | + | + | -  | + | barley and<br>rice<br>(cv.CO-39) | [175] |
| MGG_11252 | 70-15 | <i>gcf3</i>   | Cys2-His2 (C2H2)<br>zinc finger protein | fungal<br>development<br>and<br>pathogenicity | deletion | + | + | -  | + | barley and<br>rice<br>(cv.CO-39) | [175] |
| MGG_06328 | 70-15 | <i>gcf4</i>   | Cys2-His2 (C2H2)<br>zinc finger protein | fungal<br>development                         | deletion | + | + | -  | - | barley and<br>rice<br>(cv.CO-39) | [175] |
| MGG_17953 | 70-15 | <i>gcf5</i>   | Cys2-His2 (C2H2)<br>zinc finger protein | fungal<br>development                         | deletion | + | + | -  | - | barley and<br>rice<br>(cv.CO-39) | [175] |

|           |       |             |                                         |                                                                                                         |          |   |   |   |   |                                  |       |
|-----------|-------|-------------|-----------------------------------------|---------------------------------------------------------------------------------------------------------|----------|---|---|---|---|----------------------------------|-------|
| MGG_03451 | 70-15 | <i>gcf6</i> | Cys2-His2 (C2H2)<br>zinc finger protein | fungal<br>development<br>and<br>pathogenicity                                                           | deletion | + | + | - | + | barley and<br>rice<br>(cv.CO-39) | [175] |
| MGG_06364 | 70-15 | <i>gcf7</i> | Cys2-His2 (C2H2)<br>zinc finger protein | fungal<br>development                                                                                   | deletion | + | + | - | - | barley and<br>rice<br>(cv.CO-39) | [175] |
| MGG_15393 | 70-15 | <i>gcf8</i> | Cys2-His2 (C2H2)<br>zinc finger protein | fungal<br>development                                                                                   | deletion | + | + | - | - | barley and<br>rice<br>(cv.CO-39) | [175] |
| MGG_00373 | 70-15 | <i>gcp1</i> | Cys2-His2 (C2H2)<br>zinc finger protein | fungal<br>development<br>and<br>pathogenicity                                                           | deletion | + | + | - | + | barley and<br>rice<br>(cv.CO-39) | [175] |
| MGG_02474 | 70-15 | <i>gpf2</i> | Cys2-His2 (C2H2)<br>zinc finger protein | fungal<br>development<br>and<br>pathogenicity                                                           | deletion | + | - | - | + | barley and<br>rice<br>(cv.CO-39) | [175] |
| MGG_07011 | 70-15 | <i>gpf3</i> | Cys2-His2 (C2H2)<br>zinc finger protein | fungal<br>development<br>and<br>pathogenicity                                                           | deletion | + | - | - | + | barley and<br>rice<br>(cv.CO-39) | [175] |
| MGG_05133 | 70-15 | <i>crz1</i> | Cys2-His2 (C2H2)<br>zinc finger protein | fungal<br>development<br>and<br>pathogenicity,<br>calcineurin-<br>responsive<br>transcription<br>factor | deletion | + | + | - | + | barley and<br>rice<br>(cv.CO-39) | [173] |
| MGG_04699 | 70-15 | <i>flbc</i> | Cys2-His2 (C2H2)<br>zinc finger protein | fungal<br>development<br>and<br>pathogenicity,<br>calcineurin-<br>responsive<br>transcription<br>factor | deletion | + | + | + | + | barley and<br>rice<br>(cv.CO-39) | [175] |



|           |       |              |                                         |                                               |          |   |   |   |   |                                  |       |
|-----------|-------|--------------|-----------------------------------------|-----------------------------------------------|----------|---|---|---|---|----------------------------------|-------|
| MGG_00504 | 70-15 | <i>nsdc</i>  | Cys2-His2 (C2H2)<br>zinc finger protein | fungal<br>development                         | deletion | + | + | - | - | barley and<br>rice<br>(cv.CO-39) | [175] |
| MGG_02505 | 70-15 | <i>reil</i>  | Cys2-His2 (C2H2)<br>zinc finger protein | fungal<br>development<br>and<br>pathogenicity | deletion | + | + | - | + | barley and<br>rice<br>(cv.CO-39) | [175] |
| MGG_04456 | 70-15 | <i>zap1</i>  | Cys2-His2 (C2H2)<br>zinc finger protein | conidiation                                   | deletion | - | + | - | - | barley and<br>rice<br>(cv.CO-39) | [175] |
| MGG_12958 | 70-15 | <i>mst12</i> | Cys2-His2 (C2H2)<br>zinc finger protein | fungal<br>pathogenicity                       | deletion | - | - | - | + | barley and<br>rice<br>(cv.CO-39) | [175] |
| MGG_09200 | 70-15 | <i>tdg1</i>  | Cys2-His2 (C2H2)<br>zinc finger protein | fungal<br>development<br>and<br>pathogenicity | deletion | - | + | - | + | barley and<br>rice<br>(cv.CO-39) | [175] |
| MGG_14931 | 70-15 | <i>vrfl</i>  | Cys2-His2 (C2H2)<br>zinc finger protein | fungal<br>development<br>and<br>pathogenicity | deletion | - | - | + | + | barley and<br>rice<br>(cv.CO-39) | [175] |
| MGG_01776 | 70-15 | <i>vrf2</i>  | Cys2-His2 (C2H2)<br>zinc finger protein | fungal<br>development<br>and<br>pathogenicity | deletion | - | - | + | + | barley and<br>rice<br>(cv.CO-39) | [175] |
| MGG_00660 | 70-15 | <i>zfp1</i>  | Cys2-His2 (C2H2)<br>zinc finger protein | fungal<br>pathogenicity                       | deletion | - | - | - | + | barley and<br>rice<br>(cv.CO-39) | [175] |
| MGG_04865 | 70-15 | <i>zfp2</i>  | Cys2-His2 (C2H2)<br>zinc finger protein | fungal<br>development                         | deletion | + | - | - | - | barley and<br>rice<br>(cv.CO-39) | [175] |

|           |       |              |                                         |                                                |          |   |   |   |   |                                  |       |
|-----------|-------|--------------|-----------------------------------------|------------------------------------------------|----------|---|---|---|---|----------------------------------|-------|
| MGG_05714 | 70-15 | <i>zfp3</i>  | Cys2-His2 (C2H2)<br>zinc finger protein | fungal<br>development                          | deletion | + | - | - | - | barley and<br>rice<br>(cv.CO-39) | [175] |
| MGG_09780 | 70-15 | <i>zfp4</i>  | Cys2-His2 (C2H2)<br>zinc finger protein | no<br>development<br>or virulence<br>functions | deletion | - | - | - | - | barley and<br>rice<br>(cv.CO-39) | [175] |
| MGG_14806 | 70-15 | <i>zfp5</i>  | Cys2-His2 (C2H2)<br>zinc finger protein | fungal<br>development<br>and<br>pathogenicity  | deletion | + | - | - | + | barley and<br>rice<br>(cv.CO-39) | [175] |
| MGG_15508 | 70-15 | <i>zfp6</i>  | Cys2-His2 (C2H2)<br>zinc finger protein | fungal<br>pathogenicity                        | deletion | - | - | - | + | barley and<br>rice<br>(cv.CO-39) | [175] |
| MGG_00080 | 70-15 | <i>zfp7</i>  | Cys2-His2 (C2H2)<br>zinc finger protein | no<br>development<br>or virulence<br>functions | deletion | - | - | - | - | barley and<br>rice<br>(cv.CO-39) | [175] |
| MGG_02036 | 70-15 | <i>zfp8</i>  | Cys2-His2 (C2H2)<br>zinc finger protein | fungal<br>pathogenicity                        | deletion | - | - | - | + | barley and<br>rice<br>(cv.CO-39) | [175] |
| MGG_03581 | 70-15 | <i>zfp9</i>  | Cys2-His2 (C2H2)<br>zinc finger protein | fungal<br>development                          | deletion | + | - | - | - | barley and<br>rice<br>(cv.CO-39) | [175] |
| MGG_04328 | 70-15 | <i>zfp10</i> | Cys2-His2 (C2H2)<br>zinc finger protein | fungal<br>development<br>and<br>pathogenicity  | deletion | + | - | - | + | barley and<br>rice<br>(cv.CO-39) | [175] |
| MGG_05501 | 70-15 | <i>zfp11</i> | Cys2-His2 (C2H2)<br>zinc finger protein | fungal<br>pathogenicity                        | deletion | - | - | - | + | barley and<br>rice<br>(cv.CO-39) | [175] |

|                                                                                     |       |                         |                                                                            |                                                             |          |   |   |   |   |                                    |       |
|-------------------------------------------------------------------------------------|-------|-------------------------|----------------------------------------------------------------------------|-------------------------------------------------------------|----------|---|---|---|---|------------------------------------|-------|
| MGG_07013                                                                           | 70-15 | <i>zfp12</i>            | Cys2-His2 (C2H2)<br>zinc finger protein                                    | no<br>development<br>or virulence<br>functions              | deletion | - | - | - | - | barley and<br>rice<br>(cv.CO-39)   | [175] |
| MGG_07269                                                                           | 70-15 | <i>zfp13</i>            | Cys2-His2 (C2H2)<br>zinc finger protein                                    | no<br>development<br>or virulence<br>functions              | deletion | - | - | - | - | barley and<br>rice<br>(cv.CO-39)   | [175] |
| MGG_11925                                                                           | 70-15 | <i>zfp14</i>            | Cys2-His2 (C2H2)<br>zinc finger protein                                    | fungal<br>development                                       | deletion | - | + | + | - | barley and<br>rice<br>(cv.CO-39)   | [175] |
| MGG_15991                                                                           | 70-15 | <i>zfp15</i>            | Cys2-His2 (C2H2)<br>zinc finger protein                                    | fungal<br>development                                       | deletion | - | + | - | - | barley and<br>rice<br>(cv.CO-39)   | [175] |
| MGG_11201                                                                           | Ku80  | <i>crea</i>             | carbon catabolite<br>repressor,<br>Cys2-His2 (C2H2)<br>zinc finger protein | fungal<br>development<br>and<br>pathogenicity               | deletion | + | + | + | + | rice (cv.<br>CO-39)                | [174] |
| <b>Transcription factors (the basic leucine zipper (bZIP) transcription factor)</b> |       |                         |                                                                            |                                                             |          |   |   |   |   |                                    |       |
| MGG_08212                                                                           | Guy11 | <i>atfl</i>             | basic leucine zipper<br>(bZIP) transcription<br>factor                     | fungal<br>oxidative<br>stress<br>responses and<br>virulence | deletion | + | - | - | + | rice leaves<br>(cultivar<br>CO-39) | [176] |
| MGG_12814                                                                           | Guy11 | <i>apl</i>              | bZIP transcription<br>factor                                               | fungal<br>development<br>and<br>pathogenicity               | deletion | + | + | + | + | rice leaves<br>(cultivar<br>CO-39) | [177] |
| MGG_14561                                                                           | Guy11 | <i>metr/bi<br/>zp22</i> | bZIP transcription<br>factor                                               | fungal<br>development<br>and<br>pathogenicity               | deletion | + | + | - | + | rice leaves                        | [179] |

|                                    |       |               |                               |                                      |          |   |    |    |    |                                   |       |
|------------------------------------|-------|---------------|-------------------------------|--------------------------------------|----------|---|----|----|----|-----------------------------------|-------|
| MGG_09010                          | Guy11 | <i>hac1</i>   | bZIP transcription factor     | fungal development and pathogenicity | deletion | + | +  | -  | +  | rice leaves                       | [179] |
| MGG_06131                          | Guy11 | <i>bzip10</i> | bZIP transcription factor     | fungal development and pathogenicity | deletion | + | +  | +  | +  | rice leaves                       | [179] |
| MGG_01569                          | Guy11 | <i>ycp4</i>   | flavodoxin-like protein       | fungal development and pathogenicity | deletion | + | +  | +  | +  | rice leaves (cultivar CO-39)      | [180] |
| MGG_02006                          | KJ201 | <i>bzip4</i>  | bZIP transcription factor     | fungal pathogenicity                 | deletion | - | -  | -  | +  | rice seedlings (cv. Nakdongb yeo) | [178] |
| MGG_03288                          | KJ201 | <i>bzip7</i>  | bZIP transcription factor     | fungal development and pathogenicity | deletion | + | +  | -  | +  | rice seedlings (cv. Nakdongb yeo) | [178] |
| MGG_05016                          | KJ201 | <i>bzip11</i> | bZIP transcription factor     | fungal development and pathogenicity | deletion | + | -  | +  | +  | rice seedlings (cv. Nakdongb yeo) | [178] |
| MGG_05959                          | KJ201 | <i>bzip13</i> | bZIP transcription factor     | fungal development and pathogenicity | deletion | + | +  | +  | +  | rice seedlings (cv. Nakdongb yeo) | [178] |
| <b>Other transcription factors</b> |       |               |                               |                                      |          |   |    |    |    |                                   |       |
| MGG_04853                          | KJ201 | <i>hox1</i>   | homeobox transcription factor | hyphal growth                        | deletion | + | NA | NA | NA | rice seedlings (cv. Nakdongb yeo) | [182] |

|           |       |             |                                                           |                                                   |          |    |    |    |    |                                                |            |
|-----------|-------|-------------|-----------------------------------------------------------|---------------------------------------------------|----------|----|----|----|----|------------------------------------------------|------------|
| MGG_00184 | KJ201 | <i>hox2</i> | homeobox<br>transcription factor                          | conidiation                                       | deletion | NA | +  | -  | -  | rice<br>seedlings<br>(cv.<br>Nakdongb<br>yeo)  | [182]      |
| MGG_06285 | KJ201 | <i>hox4</i> | homeobox<br>transcription factor                          | conidiation                                       | deletion | NA | +  | NA | NA | rice<br>seedlings<br>(cv.<br>Nakdongb<br>yeo)  | [182]      |
| MGG_11712 | KJ201 | <i>hox6</i> | homeobox<br>transcription factor                          | hyphal growth                                     | deletion | +  | -  | -  | -  | rice<br>seedlings<br>(cv.<br>Nakdongb<br>yeo)  | [182]      |
| MGG_12865 | KJ201 | <i>hox7</i> | homeobox<br>transcription factor                          | appressoria<br>formation                          | deletion | -  | NA | +  | +  | rice<br>seedlings<br>(cv.<br>Nakdongb<br>yeo)  | [182]      |
| MGG_06258 | KJ201 | <i>fhx1</i> | forkhead-box<br>(FOX) transcription<br>factor             | fungal<br>development<br>and<br>pathogenicity     | deletion | +  | +  | +  | +  | rice<br>seedlings<br>(cv.<br>Nakdongb<br>yeo)  | [183]      |
| MGG_06422 | KJ201 | <i>hcm1</i> | FOX transcription<br>factor                               | mycelial<br>growth and<br>conidial<br>germination | deletion | +  | +  | -  | -  | rice<br>seedlings<br>(cv.<br>Nakdongb<br>yeo)  | [183]      |
| MGG_05709 | 70-15 | <i>crf1</i> | basic helix–loop–<br>helix (bHLH)<br>transcription factor | fungal<br>development<br>and<br>pathogenicity     | deletion | +  | +  | +  | +  | barley (cv.<br>ZJ-8) and<br>rice (cv.<br>CO39) | [184, 185] |
| MGG_10150 | Guy11 | <i>pacc</i> | transcription factor                                      | fungal<br>development<br>and<br>pathogenicity     | deletion | +  | +  | NA | +  | rice and<br>barley<br>seedlings                | [187]      |

|                |       |             |                                                |                                      |          |    |   |   |   |                                                                    |       |
|----------------|-------|-------------|------------------------------------------------|--------------------------------------|----------|----|---|---|---|--------------------------------------------------------------------|-------|
| MGG_10197      | 70-15 | <i>tral</i> | transcription factor                           | fungus development and pathogenicity | deletion | +  | + | + | + | rice seedling (cv. CO-39) and barley seedling (cv. Golden Promise) | [188] |
| MGG_00501      | 70-15 | <i>tdg2</i> | transcription factor                           | fungus adhesion and virulence        | deletion | NA | + | + | + | rice seedling (cv. CO-39) and barley seedling (cv. Golden Promise) | [188] |
| MGG_03148      | 70-15 | <i>tdg4</i> | Tra1-dependent gene                            | fungus sporulation and virulence     | deletion | NA | + | + | + | rice seedling (cv. CO-39) and barley seedling (cv. Golden Promise) | [188] |
| <b>Kinases</b> |       |             |                                                |                                      |          |    |   |   |   |                                                                    |       |
| MGG_00446      | Ku80  | <i>ckb1</i> | serine/threonine kinase CKb regulatory subunit | fungus development and pathogenicity | deletion | +  | + | + | + | rice (cv. CO-39)                                                   | [190] |
| MGG_05651      | Ku80  | <i>ckb2</i> | serine/threonine kinase CKb regulatory subunit | fungus development and pathogenicity | deletion | +  | + | + | + | rice (cv. CO-39)                                                   | [190] |

|           |       |             |                                                                    |                                                                                           |          |   |    |   |   |                                                              |       |
|-----------|-------|-------------|--------------------------------------------------------------------|-------------------------------------------------------------------------------------------|----------|---|----|---|---|--------------------------------------------------------------|-------|
| MGG_11326 | Guy11 | <i>ark1</i> | actin-regulating kinase, the serine/threonine protein kinase (SPK) | endocytosis and actin cytoskeleton organization, fungal development and pathogenicity     | deletion | + | +  | + | + | barley leaves (cv. Four-arris) and rice seedlings (cv. CO39) | [191] |
| MGG_06358 | Guy11 | <i>abp1</i> | MoArk1 kinase-interacting actin binding protein                    | fungal development and pathogenicity, endocytosis, actin cytoskeleton dynamics regulation | deletion | + | NA | + | + | rice seedlings (cv. CO-39)                                   | [192] |
| MGG_06399 | KJ201 | <i>yak1</i> | dual-specificity tyrosine-regulated protein kinase                 | fungal development and virulence                                                          | deletion | + | +  | + | + | rice (cv. Nakdongb yeo)                                      | [193] |
| MGG_00682 | Guy11 | <i>cks1</i> | cyclin dependent kinase subunit                                    | fungal development and pathogenicity, chitin and glucan synthase activity                 | deletion | + | +  | + | + | rice (cv. CO-39)                                             | [194] |
| MGG_06394 | Guy11 | <i>guk2</i> | atypical guanylate kinase                                          | fungal development and pathogenicity                                                      | deletion | + | +  | + | + | rice and barley                                              | [195] |
| MGG_00803 | 70-15 | <i>snf1</i> | protein kinase                                                     | sporulation and pathogenicity                                                             | deletion | + | +  | + | + | rice plant                                                   | [197] |
| MGG_06930 | Guy11 | <i>sip2</i> | $\beta$ -subunit in SNF1 pathway                                   | fungal development and pathogenicity                                                      | deletion | + | +  | + | + | rice seedlings (cv. CO39)                                    | [198] |

|           |       |             |                                   |                                                                           |          |    |   |   |   |                                   |       |
|-----------|-------|-------------|-----------------------------------|---------------------------------------------------------------------------|----------|----|---|---|---|-----------------------------------|-------|
| MGG_04005 | Guy11 | <i>snf4</i> | $\gamma$ -subunit in SNF1 pathway | fungal development and pathogenicity                                      | deletion | +  | + | + | + | rice seedlings (cv. CO39)         | [198] |
| MGG_07003 | Guy11 | <i>sak1</i> | Snf1-activating kinase            | fungal development and pathogenicity                                      | deletion | +  | + | + | + | rice seedlings (cv. CO39)         | [198] |
| MGG_07312 | Guy11 | <i>sln1</i> | histidine kinase                  | fungal development and pathogenicity, cell wall integrity                 | deletion | +  | + | + | + | rice seedlings (cv. CO-39)        | [202] |
| MGG_02665 | KJ201 | <i>pas1</i> | PAS-containing histidine kinase   | fungal development and pathogenicity                                      | deletion | NA | + | + | + | rice seedlings (cv. Nakdongb yeo) | [203] |
| MGG_01342 | 70-15 | <i>hik2</i> | histidine kinases                 | CoCl2 sensitive, ion stress (CuSO4), fungal development and pathogenicity | deletion | -  | + | - | + | rice (cv. CO-39)                  | [199] |
| MGG_12530 | 70-15 | <i>hik3</i> | histidine kinases                 | fungal development and pathogenicity                                      | deletion | -  | + | - | + | rice (cv. CO-39)                  | [199] |
| MGG_13891 | 70-15 | <i>hik4</i> | histidine kinases                 | CoCl2 sensitive, fungal development and pathogenicity                     | deletion | -  | + | - | + | rice (cv. CO-39)                  | [199] |



|                     |       |              |                                         |                                                                      |                              |   |   |   |   |                                                      |       |
|---------------------|-------|--------------|-----------------------------------------|----------------------------------------------------------------------|------------------------------|---|---|---|---|------------------------------------------------------|-------|
| MGG_11882           | 70-15 | <i>hik5</i>  | histidine kinases                       | fungal development and pathogenicity, cell wall integrity            | deletion                     | - | + | + | + | rice (cv. CO-39)                                     | [199] |
| MGG_06696           | 70-15 | <i>hik6</i>  | histidine kinases                       | fungal development and pathogenicity                                 | deletion                     | - | + | - | + | rice (cv. CO-39)                                     | [199] |
| MGG_01227           | 70-15 | <i>hik8</i>  | histidine kinases                       | CoCl2 sensitive, fungal development and pathogenicity                | deletion                     | - | + | + | + | rice (cv. CO-39)                                     | [199] |
| <b>Phosphatases</b> |       |              |                                         |                                                                      |                              |   |   |   |   |                                                      |       |
| MGG_01690           | P131  | <i>ppg1</i>  | serine/threonine-protein phosphatase 2A | asexual development and fungal pathogenicity                         | T-DNA insertion and deletion | + | + | + | + | rice seedlings (cultivar Lijiangxint uanheigu (LTH)) | [204] |
| MGG_04637           | Guy11 | <i>cdc14</i> | dual-specificity phosphatases           | fungal development and pathogenicity                                 | deletion                     | + | + | + | + | rice (cv. CO-39)                                     | [205] |
| MGG_03860           | Guy11 | <i>tps1</i>  | trehalose-6-phosphate (T6P) synthase    | carbon and nitrogen metabolism, fungal development and pathogenicity | deletion                     | + | + | + | + | rice seedlings (cv. CO39)                            | [207] |

|                                                    |       |             |                                   |                                                       |                                                                           |   |    |    |   |                                                  |       |
|----------------------------------------------------|-------|-------------|-----------------------------------|-------------------------------------------------------|---------------------------------------------------------------------------|---|----|----|---|--------------------------------------------------|-------|
| MGG_03441                                          | 70-15 | <i>tps2</i> | trehalose 6-phospahte phosphatase | fungal development and pathogenicity                  | deletion                                                                  | + | +  | +  | + | barley leaves                                    | [206] |
| MGG_00543                                          | Guy11 | <i>tps3</i> | T6P regulatory subunit            | fungal pathogenicity                                  | deletion                                                                  | - | NA | NA | + | rice seedlings (cv. CO39)                        | [206] |
| MGG_09994                                          | KJ201 | <i>lpp3</i> | lipid phosphate phosphatase       | fungal development and pathogenicity                  | deletion                                                                  | + | NA | +  | + | rice seedlings (cv. Nakdongb yeo)                | [208] |
| MGG_12462                                          | KJ201 | <i>lpp5</i> | lipid phosphate phosphatase       | fungal development and pathogenicity                  | deletion                                                                  | - | NA | +  | + | rice seedlings (cv. Nakdongb yeo)                | [208] |
| MGG_01311                                          | P131  | <i>pah1</i> | phosphatidate phosphatase         | fungal development and pathogenesis, lipid metabolism | deletion the polyethyl ene glycol (PEG)-mediated approach , hygromy cin B | + | +  | NA | + | rice leaves (cv. Lijiangxint uanheigu)           | [209] |
| <b>Peroxisomal and mitochondrial related genes</b> |       |             |                                   |                                                       |                                                                           |   |    |    |   |                                                  |       |
| MGG_09299                                          | Guy11 | <i>pex1</i> | peroxin 1 gene                    | fungal development and pathogenicity                  | T-DNA insertion and deletion                                              | + | +  | +  | + | rice (cv. CO-39) and barley (cv. Golden Promise) | [217] |

|           |       |               |                                                                        |                                                                                             |                              |   |   |   |   |                                        |       |
|-----------|-------|---------------|------------------------------------------------------------------------|---------------------------------------------------------------------------------------------|------------------------------|---|---|---|---|----------------------------------------|-------|
| MGG_10840 | Guy11 | <i>pex5</i>   | peroxisomal matrix protein, peroxisomal targeting signal 1 (PTS1) gene | fungal development and pathogenicity                                                        | deletion                     | + | + | + | + | rice (cv. CO39) and barley (cv. ZJ-8)  | [216] |
| MGG_00529 | Guy11 | <i>pex6</i>   | peroxisomal acetyl-CoA                                                 | fungal development and pathogenicity                                                        | deletion                     | + | + | + | + | rice (cv. CO-39)                       | [210] |
| MGG_01481 | KJ201 | <i>pex7</i>   | PTS2 (Peroxisomal Targeting Signal 2) receptor gene                    | fungal development and pathogenicity                                                        | T-DNA insertion and deletion | + | + | + | + | rice leaves                            | [211] |
| MGG_08896 | Guy11 | <i>pex11A</i> | Pex11 Family Member                                                    | peroxisomal proliferation, fungal development and virulence                                 | deletion                     | + | + | + | + | rice (cv. CO-39) and barley (cv. ZJ-8) | [212] |
| MGG_00157 | Guy11 | <i>pex13</i>  | key component of the peroxisomal docking complex                       | fungal development and pathogenicity, peroxisome formation, lipid degradation and migration | deletion                     | + | + | + | + | rice (cv. CO-39) and barley (cv. ZJ-8) | [213] |
| MGG_01028 | Guy11 | <i>pex14</i>  | key component of the peroxisomal docking complex                       | fungal development and pathogenicity, peroxisome formation, lipid degradation and migration | deletion                     | + | + | + | + | rice (cv. CO-39) and barley (cv. ZJ-8) | [213] |

|           |                |                 |                                                    |                                                                                   |                              |   |   |   |   |                                                                     |       |
|-----------|----------------|-----------------|----------------------------------------------------|-----------------------------------------------------------------------------------|------------------------------|---|---|---|---|---------------------------------------------------------------------|-------|
| MGG_01081 | Guy11          | <i>pex14/17</i> | filamentous fungus-specific peroxin                | fungal development and pathogenicity, fatty acid utilization, cell wall integrity | deletion                     | - | + | + | + | barley (cv. ZJ-8) and rice (cv. CO-39)                              | [214] |
| MGG_00971 | Guy11          | <i>pex19</i>    | peroxisomes-related proteins                       | peroxisomal structure maintenance, fungal development and pathogenicity           | deletion                     | + | + | + | + | rice seedlings (cv. CO-39) and barley (cv. ZJ-8)                    | [215] |
| MGG_01711 | P131 and S1528 | <i>pefl</i>     | peroxisomal fission gene 1                         | fungal development and pathogenicity, peroxisomal fission                         | T-DNA insertion and deletion | + | - | + | + | rice seedling (cv. LTH) and barley seedling (cv. E9)                | [218] |
| MGG_01721 | Guy11          | <i>pth2</i>     | peroxisome-associated carnitine acetyltransferase  | fungal development and pathogenicity                                              | deletion                     | + | - | + | + | rice (cv. CO-39) and barley (cv. Golden Promise)                    | [220] |
| MGG_06199 | Guy11          | <i>pcs60</i>    | peroxisomal-CoA synthetase                         | fatty acid metabolism and fungal pathogenicity                                    | deletion                     | + | + | - | + | rice seedlings cv. (CO39)                                           | [221] |
| MGG_02525 | P131           | <i>agtl</i>     | peroxisomal alanine: glyoxylate aminotransferase 1 | appressoria formation and pathogenicity                                           | deletion                     | - | - | + | + | rice seedlings (cultivar Ribenqing) and barley (cultivar CDC Silky) | [222] |

|           |       |              |                                                           |                                                                            |                              |   |   |   |   |                                                  |       |
|-----------|-------|--------------|-----------------------------------------------------------|----------------------------------------------------------------------------|------------------------------|---|---|---|---|--------------------------------------------------|-------|
| MGG_08690 | Guy11 | <i>scad2</i> | short-chain acyl-CoA dehydrogenase                        | fungal development and pathogenicity                                       | deletion                     | - | + | + | + | rice (cv. CO-39)                                 | [224] |
| MGG_01719 | Guy11 | <i>etfA</i>  | electron-transferring flavoprotein (ETF) $\alpha$ subunit | fatty acid metabolism, fungal development and virulence                    | deletion                     | + | + | + | + | rice (cv. CO-39) and barley (cv. Golden Promise) | [226] |
| MGG_01744 | Guy11 | <i>etfB</i>  | electron-transferring flavoprotein (ETF) $\beta$ subunit  | fatty acid metabolism, fungal development and virulence                    | T-DNA insertion and deletion | + | + | + | + | rice (cv. CO-39) and barley (cv. Golden Promise) | [226] |
| MGG_08880 | Guy11 | <i>etfdh</i> | electron-transferring flavoprotein (ETF) dehydrogenase    | fatty acid metabolism, fungal development and virulence                    | deletion                     | + | + | + | + | rice (cv. CO-39) and barley (cv. Golden Promise) | [226] |
| MGG_12868 | B157  | <i>ech1</i>  | Enoyl-CoA hydratase                                       | conidial germination and invasive growth                                   | deletion                     | + | + | + | + | barley and rice leaves                           | [227] |
| MGG_03335 | Guy11 | <i>auh1</i>  | 3-methylglutaconyl-CoA hydratase-encoding gene            | fungal development and pathogenicity, mitochondrial fission/fusion balance | deletion                     | + | + | - | + | rice (cv. CO-39)                                 | [228] |
| MGG_06075 | Guy11 | <i>fis1</i>  | mitochondrial fission protein                             | fungal development and virulence                                           | deletion                     | + | + | - | + | rice (cv. CO-39) and barley                      | [229] |

|           |       |              |                                        |                                                                             |          |   |   |   |   |                                                 |       |
|-----------|-------|--------------|----------------------------------------|-----------------------------------------------------------------------------|----------|---|---|---|---|-------------------------------------------------|-------|
| MGG_06361 | Guy11 | <i>dnm1</i>  | dynammin                               | fungus development and pathogenicity, peroxisomal and mitochondrial fission | deletion | + | + | + | + | rice (cv. CO-39)                                | [230] |
| MGG_01711 | Guy11 | <i>mdv1</i>  | WD-40 repeat protein                   | fungus development and pathogenicity, peroxisomal and mitochondrial fission | deletion | + | + | + | + | rice (cv. CO-39)                                | [230] |
| MGG_02540 | Guy11 | <i>ivd</i>   | isovaleryl-CoA dehydrogenase           | leucine catabolism, fungus conidiation and pathogenicity                    | deletion | + | + | - | + | rice (cv. CO-39)                                | [231] |
| MGG_01755 | Ku80  | <i>acat1</i> | acetoacetyl-CoA acetyltransferase gene | fungus pathogenicity                                                        | deletion | - | - | - | + | rice (cv. CO-39) and barley (cv. Jinchang 1316) | [232] |
| MGG_13499 | Ku80  | <i>acat2</i> | acetoacetyl-CoA acetyltransferase gene | fungus development and virulence                                            | deletion | + | - | - | + | rice (cv. CO-39) and barley (cv. Jinchang 1316) | [232] |

**Other important genes in *M. oryzae* biology**

|           |                 |              |                                                               |                                                                                |          |   |   |    |   |                           |       |
|-----------|-----------------|--------------|---------------------------------------------------------------|--------------------------------------------------------------------------------|----------|---|---|----|---|---------------------------|-------|
| MGG_07219 | 70-15           | <i>alb1</i>  | polyketide synthase, melanin synthesis gene                   | fungal melanin and pathogenicity                                               | deletion | + | + | +  | + | barley or rice leaves     | [235] |
| MGG_05059 | Guy11 and 70-15 | <i>rsy1</i>  | scytalone dehydratase, melanin synthesis gene                 | fungal melanin and pathogenicity                                               | deletion | + | + | +  | + | barley or rice leaves     | [235] |
| MGG_02252 | Guy11 and 70-15 | <i>buf1</i>  | 1,3,8-trihydroxynaphthalene reductase, melanin synthesis gene | fungal melanin and pathogenicity                                               | deletion | + | + | -  | + | barley or rice leaves     | [235] |
| MGG_14221 | B157            | <i>tam1</i>  | tryptophan aminotransferase                                   | fungal auxin/IAA biosynthesis, fungal development and pathogenicity            | deletion | + | + | NA | + | rice seedlings (cv. CO39) | [237] |
| MGG_01892 | B157            | <i>ipd1</i>  | indole-3-pyruvate decarboxylase                               | fungal auxin/IAA biosynthesis, fungal development and pathogenicity            | deletion | + | + | NA | + | rice seedlings (cv. CO39) | [237] |
| MGG_13453 | 70-15           | <i>rdrp2</i> | RNA interference (RNAi) gene                                  | generation of small noncoding RNA (sRNA), fungal development and pathogenicity | deletion | + | + | NA | + | barley leaves             | [239] |

|           |       |               |                                                               |                                                                                |          |   |   |    |   |                                                                                             |       |
|-----------|-------|---------------|---------------------------------------------------------------|--------------------------------------------------------------------------------|----------|---|---|----|---|---------------------------------------------------------------------------------------------|-------|
| MGG_01294 | 70-15 | <i>ago3</i>   | RNA interference (RNAi) gene                                  | generation of small noncoding RNA (sRNA), fungal development and pathogenicity | deletion | + | + | NA | + | barley leaves                                                                               | [239] |
| MGG_04621 | 70-15 | <i>yth1</i>   | N6-methyladenosine (m6A)-binding protein                      | RNA methylation and fungal pathogenicity                                       | deletion | - | - | -  | + | rice seedlings (cv. CO39)                                                                   | [242] |
| MGG_00637 | 70-15 | <i>yth2</i>   | N6-methyladenosine (m6A)-binding protein                      | RNA methylation, fungal conidiation and pathogenicity                          | deletion | - | + | -  | + | rice seedlings (cv. CO39)                                                                   | [242] |
| MGG_01492 | 70-15 | <i>ime4</i>   | N6-adenosine-methyltransferase                                | RNA methylation and fungal pathogenicity                                       | deletion | - | - | -  | + | rice seedlings (cv. CO39)                                                                   | [242] |
| MGG_01363 | 70-15 | <i>alkb1</i>  | mRNA:N6-methyladenosine demethylase                           | RNA methylation and fungal pathogenicity                                       | deletion | - | - | -  | + | rice seedlings (cv. CO39)                                                                   | [242] |
| MGG_15053 | Br48  | <i>set1</i>   | histone H3K4 methyltransferase                                | fungal development and pathogenicity                                           | deletion | + | + | +  | + | wheat (cv. Norin 4, Chinese spring and Thatcher) and barley (cv. Russian No.74 and Nigrate) | [244] |
| MGG_05969 | KJ201 | <i>rtt109</i> | regulator of Ty1 transposition 109, histone acetyltransferase | fungal development and pathogenicity                                           | deletion | + | + | -  | + | rice seedlings (cv. Nagdong)                                                                | [245] |



|           |                 |             |                                                                             |                                      |          |   |   |   |   |                                                              |       |
|-----------|-----------------|-------------|-----------------------------------------------------------------------------|--------------------------------------|----------|---|---|---|---|--------------------------------------------------------------|-------|
| MGG_04615 | KJ201           | <i>sas3</i> | MYST family histone acetyltransferase                                       | fungus development and pathogenicity | deletion | + | + | + | + | rice seedlings (cv. Nakdongb yeo)                            | [246] |
| MGG_05857 | B157            | <i>rpd3</i> | histone deacetylase                                                         | fungus development and pathogenicity | deletion | + | + | - | + | barley seedlings (cv. Golden Promise) and rice (cv. LTH)     | [247] |
| MGG_04588 | B157            | <i>hst4</i> | histone deacetylase                                                         | fungus development and pathogenicity | deletion | + | + | - | + | barley seedlings (cv. Golden Promise) and rice (cv. LTH)     | [247] |
| MGG_03198 | Guy11 and 70-15 | <i>tig1</i> | component of histone deacetylase (HDAC) transcriptional corepressor complex | fungus development and pathogenicity | deletion | + | + | - | + | rice leaves (cultivar Nipponbare or CO-39) and barley leaves | [248] |
| MGG_01633 | Guy11 and 70-15 | <i>hos2</i> | component of the TIG1 histone deacetylase complex                           | fungus development and pathogenicity | deletion | + | + | - | + | rice leaves (cv. Nipponbare or CO-39) and barley leaves      | [248] |
| MGG_14558 | Guy11 and 70-15 | <i>snt1</i> | component of the TIG1 histone deacetylase complex                           | fungus development and pathogenicity | deletion | + | + | - | + | rice leaves (cv. Nipponbare or CO-39) and barley leaves      | [248] |

|           |                 |             |                                                   |                                                                 |          |    |   |    |   |                                                             |       |
|-----------|-----------------|-------------|---------------------------------------------------|-----------------------------------------------------------------|----------|----|---|----|---|-------------------------------------------------------------|-------|
| MGG_01558 | Guy11 and 70-15 | <i>set3</i> | Tig1-interacting protein                          | fungus development and pathogenicity                            | deletion | NA | + | NA | + | rice leaves (cv. Nipponbare or CO-39) and barley leaves     | [248] |
| MGG_02488 | Guy11 and 70-15 | <i>hst1</i> | component of the TIG1 histone deacetylase complex | fungus development and pathogenicity                            | deletion | +  | + | -  | + | rice leaves (cv. Nipponbare or CO-39) and barley leaves     | [248] |
| MGG_04878 | KJ201           | <i>jmj1</i> | histone demethylase containing JmjC domain        | fungus development and pathogenicity                            | deletion | +  | + | +  | + | rice seedlings (cv. Nakdongb yeo)                           | [249] |
| MGG_00750 | Guy11           | <i>nox1</i> | NADPH oxidase-encoding gene                       | production of superoxide, fungus development and virulence      | deletion | +  | - | +  | + | rice (cv. CO-39)                                            | [250] |
| MGG_06559 | Guy11           | <i>nox2</i> | NADPH oxidase-encoding gene                       | production of superoxide, fungus development and virulence      | deletion | +  | - | +  | + | rice (cv. CO-39)                                            | [250] |
| MGG_07190 | Guy11           | <i>pmt2</i> | O-mannosyltransferases                            | fungus development and virulence                                | deletion | +  | + | +  | + | rice (cv. CO-39) and barley                                 | [251] |
| MGG_04427 | Guy11           | <i>pmt4</i> | O-mannosyltransferases                            | fungus development and virulence, lipid and glycogen metabolism | deletion | +  | + | +  | + | rice seedlings (cv. CO-39) and barleys (cv. Golden Promise) | [252] |

|           |       |             |                                                                 |                                               |          |   |   |   |   |                       |            |
|-----------|-------|-------------|-----------------------------------------------------------------|-----------------------------------------------|----------|---|---|---|---|-----------------------|------------|
| MGG_02444 | 70-15 | <i>plc1</i> | phospholipase C<br>gene                                         | fungus<br>development<br>and<br>pathogenicity | deletion | + | + | + | + | rice (cv.<br>Nagdong) | [253, 254] |
| MGG_05332 | KJ201 | <i>plc2</i> | phospholipase C<br>gene, Ca2+-<br>dependent<br>membrane binding | fungus<br>development<br>and<br>pathogenicity | deletion | - | + | + | + | rice (cv.<br>Nagdong) | [253, 254] |
| MGG_08315 | KJ201 | <i>plc3</i> | phospholipase C<br>gene, Ca2+-<br>dependent<br>membrane binding | fungus<br>development<br>and<br>pathogenicity | deletion | - | + | + | + | rice (cv.<br>Nagdong) | [253, 254] |

**(f) Genes not discussed in detail. Due to space constraints, these genes are not examined in detail here. They are ordered according to their gene codes.**

| Gene code | Fungal Reference Strain | Mutant Name  | Gene Full Name/<br>Encoding Protein               | Main Functions                                                          | Mutant Type                  | Mutant Phenotypes |                                |                                       |           | Tested Hosts                                                      | Reference |
|-----------|-------------------------|--------------|---------------------------------------------------|-------------------------------------------------------------------------|------------------------------|-------------------|--------------------------------|---------------------------------------|-----------|-------------------------------------------------------------------|-----------|
|           |                         |              |                                                   |                                                                         |                              | Hyphal Growth     | Conidia Growth/<br>Development | Appressoria Formation/<br>Development | Virulence |                                                                   |           |
| MGG_00255 | KJ201                   | <i>ypel2</i> | yippee-like (YPEL) gene family                    | fungal development and pathogenicity                                    | deletion                     | -                 | +                              | +                                     | +         | rice (cv. Nakdongbye)                                             | [255]     |
| MGG_00748 | Guy11                   | <i>myo1</i>  | class I myosin protein                            | fungal development and pathogenicity                                    | RNAi                         | +                 | +                              | +                                     | +         | rice seedlings (cv. CO-39) and barley leaves (cv. Golden Promise) | [256]     |
| MGG_00753 | KJ201                   | <i>rbp9</i>  | Ran-binding protein microtubule-organizing center | fungal development and pathogenicity, polycyclic dissemination          | deletion                     | +                 | +                              | +                                     | +         | rice seedlings (cv. Nakdongbye)                                   | [257]     |
| MGG_00874 | B157                    | <i>dam1</i>  | outer kinetochore DASH complex gene               | fungal development and pathogenicity, proper segregation of chromosomes | deletion                     | +                 | +                              | +                                     | +         | rice (cv. CO-39)                                                  | [258]     |
| MGG_01043 | Guy11                   | <i>crec</i>  | WD40-repeat protein                               | carbon repression, fungal development and pathogenicity                 | deletion                     | +                 | +                              | +                                     | +         | barley (cv. Gold Promise) and rice (cv. CO39) leaves              | [259]     |
| MGG_01057 | Guy11                   | <i>ldb1</i>  | LIM binding domain-containing protein             | fungal development and pathogenicity                                    | T-DNA insertion and deletion | +                 | +                              | +                                     | +         | rice and barley leaves                                            | [260]     |

|           |       |              |                                                                |                                          |          |   |   |    |   |                                                 |       |
|-----------|-------|--------------|----------------------------------------------------------------|------------------------------------------|----------|---|---|----|---|-------------------------------------------------|-------|
| MGG_01092 | Guy11 | <i>lys20</i> | a homocitrate synthase                                         | fungal development and pathogenicity     | deletion | + | + | NA | + | rice seedlings (cv. CO-39)                      | [261] |
| MGG_01104 | Guy11 | <i>ilv6</i>  | acetolactate synthase (ALS) catalytic subunit                  | fungal development and pathogenicity     | deletion | + | + | +  | + | rice and barley leaves                          | [262] |
| MGG_01185 | Guy11 | <i>rab5b</i> | GTP-binding protein                                            | fungal development and pathogenicity     | deletion | + | + | +  | + | rice (cv. CO39) and barley (cv. Golden Promise) | [263] |
| MGG_01202 | Ku70  | <i>dld1</i>  | D-lactate dehydrogenase                                        | fungal development and pathogenicity     | deletion | + | + | +  | + | barley (cv. CDC silky)                          | [264] |
| MGG_01215 | P131  | <i>com1</i>  | conidium morphology mutant 1, putative transcription regulator | fungal conidium morphology and virulence | deletion | + | + | +  | + | rice and barley seedlings                       | [265] |
| MGG_01284 | Guy11 | <i>trr1</i>  | thioredoxin reductase                                          | fungal development and pathogenicity     | deletion | - | + | +  | + | rice seedlings (cv. CO-39)                      | [266] |
| MGG_01434 | Ku80  | <i>vps17</i> | sorting nexin                                                  | fungal development and pathogenicity     | deletion | + | + | +  | + | barley (cv. Four-arrris) and rice (cv. CO-39)   | [267] |
| MGG_01606 | Guy11 | <i>msdh</i>  | methylmalonate-semialdehyde dehydrogenase                      | fungal development and pathogenicity     | deletion | - | + | +  | + | rice (cv. CO-39)                                | [268] |

|           |                |              |                                                                  |                                                             |                              |   |   |   |   |                                                                    |       |
|-----------|----------------|--------------|------------------------------------------------------------------|-------------------------------------------------------------|------------------------------|---|---|---|---|--------------------------------------------------------------------|-------|
| MGG_01728 | Guy11          | <i>met13</i> | methylenetetrahydrofolate reductases (MTHFRs)                    | fungal development and pathogenicity                        | T-DNA insertion and deletion | + | + | + | + | rice seedling (cv. CO-39) and barley seedling (cv. Golden Promise) | [269] |
| MGG_01743 | Guy11          | <i>cpa1</i>  | CPSase <sub>sm</sub> chain and GATase domains containing protein | fungal development and pathogenicity, arginine biosynthesis | deletion                     | + | + | + | + | barley                                                             | [270] |
| MGG_01802 | P131 and S1528 | <i>chs1</i>  | chitin synthase gene                                             | fungal development and pathogenicity                        | deletion                     | + | + | + | + | rice leaf sheaths and barley leaves                                | [271] |
| MGG_02549 | Guy11          | <i>erl1</i>  | Era (Escherichia coli Ras)-like GTPase                           | fungal development and pathogenicity                        | deletion                     | - | - | + | + | rice roots                                                         | [272] |
| MGG_02611 | Guy11          | <i>lys2</i>  | l-aminoadipate-semialdehyde dehydrogenase                        | lysine biosynthesis, fungal development and pathogenicity   | deletion                     | - | + | - | + | rice seedlings (cv.CO-39)                                          | [273] |
| MGG_02616 | 70-15          | <i>mcl1</i>  | 2-methylisocitrate lyase                                         | fungal development and pathogenicity, methylcitrate cycle   | deletion                     | + | + | - | + | barley (cv. ZJ-8) and rice (cv. CO-39)                             | [274] |
| MGG_02689 | Guy11          | <i>alol</i>  | D-Arabinono-1,4-lactone Oxidase                                  | fungal development and pathogenicity                        | deletion                     | + | + | + | + | rice (cv. CO-39) and barley (cv. ZJ-8)                             | [275] |

|           |       |              |                                                  |                                                           |                              |    |   |    |   |                                                                   |       |
|-----------|-------|--------------|--------------------------------------------------|-----------------------------------------------------------|------------------------------|----|---|----|---|-------------------------------------------------------------------|-------|
| MGG_02875 | Guy11 | <i>teal</i>  | kelch domain-containing protein                  | fungal development and pathogenesis                       | deletion                     | +  | + | +  | + | rice seedlings (cv. CO39)                                         | [276] |
| MGG_02884 | Guy11 | <i>flp1</i>  | fungal fasciclin-like protein                    | fungal conidiation and pathogenicity                      | deletion                     | -  | + | -  | + | rice seedlings (cv. CO-39) and barley leaves (cv. ZJ-8)           | [276] |
| MGG_02916 | B157  | <i>twl</i>   | circadian-regulated twilight                     | fungal development and virulence                          | deletion                     | -  | + | NA | + | barley leaf explants and rice leaf explants                       | [278] |
| MGG_02961 | KJ201 | <i>and1</i>  | cell cortex protein                              | fungal asexual and sexual development and pathogenicity   | deletion                     | -  | + | +  | + | rice seedlings (cv. Nakdongbye o)                                 | [279] |
| MGG_03060 | Guy11 | <i>myo2</i>  | class II myosin                                  | fungal development and pathogenicity, cell wall integrity | T-DNA insertion and deletion | +  | + | +  | + | rice seedlings (cv. CO-39) and barley leaves (cv. Golden Promise) | [280] |
| MGG_03065 | Guy11 | <i>vma11</i> | putative vacuolar ATPase c' subunit              | vacuolar acidification and fungal pathogenicity           | deletion                     | +  | + | +  | + | rice (cv. CO39) and barley leaves                                 | [281] |
| MGG_03090 | Guy11 | <i>lag1</i>  | sphingosine N-acyltransferase                    | fungal development and pathogenicity                      | deletion                     | +  | + | +  | + | barley and rice (cv. CO-39)                                       | [282] |
| MGG_03123 | Guy11 | <i>mdt1</i>  | multidrug and toxin extrusion (MATE)-family pump | fungal development and pathogenicity                      | deletion                     | NA | + | -  | + | rice leaves (cultivar CO-39)                                      | [283] |

|           |       |               |                                                                             |                                                                              |          |   |   |    |   |                                                      |       |
|-----------|-------|---------------|-----------------------------------------------------------------------------|------------------------------------------------------------------------------|----------|---|---|----|---|------------------------------------------------------|-------|
| MGG_03147 | 70-15 | <i>gpd2</i>   | glycerol-3-phosphate (G-3-P) shuttle                                        | fungal development and pathogenicity                                         | deletion | + | + | NA | + | barley and rice (cv. CO-39)                          | [284] |
| MGG_03241 | KJ201 | <i>arrdc1</i> | alpha-arrestin                                                              | fungal development and pathogenicity                                         | deletion | + | + | -  | + | rice (cv. CO-39)                                     | [285] |
| MGG_03313 | Guy11 | <i>vps41</i>  | homotypic fusion and protein sorting protein complex (HOPS) protein         | sexual and asexual reproduction, vacuolar morphogenesis and pathogenicity    | deletion | + | + | -  | + | barley (cv. Gold Promise) and rice (cv. CO39) leaves | [286] |
| MGG_03670 | 70-15 | <i>spm1</i>   | vacuolar serine protease                                                    | appressoria development and pathogenicity                                    | deletion | + | + | +  | + | intact and wounded barley plants                     | [287] |
| MGG_03855 | Guy11 | <i>elf3k</i>  | eukaryotic translation initiation factor 3 (eIF3) domain containing protein | fungal development and pathogenicity                                         | deletion | + | + | +  | + | rice seedlings (cv. CO39)                            | [288] |
| MGG_04000 | 70-15 | <i>rfx1</i>   | regulatory factor X protein                                                 | fungal development and pathogenicity, chitin metabolism, cell wall integrity | deletion | + | + | +  | + | rice (cv. CO-39)                                     | [289] |



|           |        |               |                                                                                        |                                                           |                         |   |   |   |   |                                                |       |
|-----------|--------|---------------|----------------------------------------------------------------------------------------|-----------------------------------------------------------|-------------------------|---|---|---|---|------------------------------------------------|-------|
| MGG_04050 | Guy11  | <i>sec22</i>  | soluble N-ethylmaleimide-sensitive factor attachment protein receptor (SNARE) proteins | fungal development and pathogenicity                      | deletion                | + | + | + | + | rice leaves (cultivar CO-39)                   | [290] |
| MGG_04163 | B157   | <i>des1</i>   | host-defense suppressor pathogenicity gene                                             | fungal development and pathogenicity                      | RNA interference (RNAi) | + | + | + | + | rice leaves and sheath                         | [291] |
| MGG_04377 | Guy11  | <i>lrg1</i>   | LIM (Lin-11, Isl-1 and Mec-3) protein-encoding gene                                    | fungal development and pathogenicity                      | deletion                | + | + | + | + | barley leaves (cv. Golden Promise)             | [292] |
| MGG_04527 | Guy11  | <i>per1</i>   | glycosylphosphatidylinositol (GPI)-anchored protein                                    | fungal development and pathogenicity, cell wall integrity | deletion                | + | + | + | + | rice (cv. CO-39)                               | [293] |
| MGG_04626 | KV1    | <i>mca1</i>   | metacaspase                                                                            | fungal development and pathogenicity                      | deletion                | - | + | + | + | rice seedlings (cv. YT16)                      | [294] |
| MGG_04628 | Guy11  | <i>cyp51a</i> | sterol 14 $\alpha$ -demethylase                                                        | fungal development and pathogenicity                      | deletion                | - | + | - | + | rice leaves (cultivar CO-39)                   | [295] |
| MGG_04676 | Hoku-1 | <i>bub2</i>   | mitotic check point protein                                                            | fungal development and pathogenicity                      | deletion                | + | + | + | + | barley (Hordeum vulgare L. 'Nakaizumi-zairai') | [296] |

|           |       |               |                                                                                         |                                                     |                                |   |    |   |   |                                                            |            |
|-----------|-------|---------------|-----------------------------------------------------------------------------------------|-----------------------------------------------------|--------------------------------|---|----|---|---|------------------------------------------------------------|------------|
| MGG_05247 | 70-15 | <i>mgd1</i>   | NAD(+) dependent glutamate dehydrogenase (NAD-GDH)                                      | fungal development and pathogenicity                | deletion                       | + | NA | + | + | barley plants                                              | [31]       |
| MGG_05428 | Guy11 | <i>vam7</i>   | soluble N-ethylmaleimide-sensitive factor attachment protein receptor (SNARE) proteins  | fungal development and pathogenicity                | deletion                       | + | +  | + | + | rice leaves (cultivar CO-39)                               | [297]      |
| MGG_05738 | Guy11 | <i>pax1</i>   | LIM (Lin-11, Isl-1 and Mec-3) protein-encoding gene                                     | fungal development and pathogenicity                | deletion                       | + | +  | + | + | barley leaves (cv. Golden Promise)                         | [292]      |
| MGG_05755 | Guy11 | <i>mon1</i>   | gene involved in sensitivity to brefeldin A and monensin                                | vacuolar assembly, conidiogenesis and pathogenicity | deletion                       | + | +  | + | + | rice seedlings                                             | [298]      |
| MGG_05814 | Guy11 | <i>kdc dh</i> | family four aldehyde dehydrogenases (ALDHs), potassium-activated aldehyde dehydrogenase | fungal development and pathogenicity                | T-DNA insertion and knock down | + | +  | + | + | rice (cv. CO-39)                                           | [299]      |
| MGG_05871 | B157  | <i>pth11</i>  | plasma membrane protein, CMEF domain-containing protein                                 | fungal development and pathogenicity                | deletion                       | - | +  | + | + | rice seedling (cv. CO39) and barley seedling (cv. Express) | [300, 301] |

|           |                              |              |                                                   |                                                                        |          |    |    |   |   |                                                 |       |
|-----------|------------------------------|--------------|---------------------------------------------------|------------------------------------------------------------------------|----------|----|----|---|---|-------------------------------------------------|-------|
| MGG_06011 | Guy11                        | <i>sfal</i>  | S-(hydroxymethyl)- glutathione dehydrogenase gene | fungal conidiation and virulence                                       | deletion | +  | +  | + | + | rice (cv. CO-39)                                | [302] |
| MGG_06064 | P131 and S1528               | <i>chs7</i>  | chitin synthase gene                              | fungal development and pathogenicity                                   | deletion | NA | NA | + | + | rice leaf sheaths and barley leaves             | [271] |
| MGG_06180 | Guy11                        | <i>end3</i>  | endocytic protein                                 | appressorium formation and pathogenicity, F-actin assembly             | deletion | -  | -  | + | + | rice (cv. CO39) and barley (cv. Four-arris)     | [303] |
| MGG_06241 | Guy11                        | <i>rab5a</i> | vacuolar protein sorting-associated protein 21    | fungal development and pathogenicity                                   | deletion | +  | +  | + | + | rice (cv. CO39) and barley (cv. Golden Promise) | [263] |
| MGG_06263 | KJ201                        | <i>ypel1</i> | yippee-like (YPEL) gene family                    | fungal development and pathogenicity                                   | deletion | +  | +  | + | + | rice (cv. Nakdongbye)                           | [255] |
| MGG_06439 | B157 (field isolate, mat1-2) | <i>tea4</i>  | polarity determinant                              | asexual development and pathogenicity                                  | deletion | -  | +  | + | + | rice and barley leaves                          | [304] |
| MGG_06537 | Guy11                        | <i>vps13</i> | vacuolar protein-sorting receptor                 | fungal conidiation and pathogenicity, endoplasmic reticulum (ER)-phagy | deletion | -  | +  | - | + | rice seedlings cv. (CO39)                       | [305] |
| MGG_06564 | Guy11                        | <i>pac2</i>  | Gti1/Pac2 family domain-containing protein        | fungal development and pathogenicity                                   | deletion | +  | +  | + | + | rice leaves                                     | [306] |

|           |                 |              |                                               |                                                           |          |   |   |   |   |                                                        |            |
|-----------|-----------------|--------------|-----------------------------------------------|-----------------------------------------------------------|----------|---|---|---|---|--------------------------------------------------------|------------|
| MGG_06843 | KJ301           | <i>abfb</i>  | arabinofuranosidase-B protein                 | fungal development and pathogenicity, cell wall integrity | deletion | + | + | - | + | rice (cv. L. Jinheung)                                 | [307]      |
| MGG_06868 | Guy11           | <i>ilv2</i>  | acetolactate synthase (ALS) catalytic subunit | fungal development and pathogenicity                      | deletion | + | + | + | + | rice and barley leaves                                 | [262]      |
| MGG_06898 | Guy11 and KJ201 | <i>myb1</i>  | myeloblastosis gene                           | fungal development and pathogenicity                      | deletion | + | + | - | + | rice (cv. CO-39)                                       | [308, 309] |
| MGG_07135 | Guy11           | <i>pyr5</i>  | Ooatate phosphoribosyl transferase            | fungal development and virulence                          | deletion | + | - | + | + | rice (cv. CO-39) and barley (cv. Golden Promise)       | [310]      |
| MGG_07173 | B157            | <i>ypd1</i>  | histidine phosphotransferase                  | fungal development and pathogenicity                      | deletion | - | + | + | + | rice (cv. CO-39)                                       | [311]      |
| MGG_07224 | Guy11           | <i>ilv1</i>  | threonine deaminase                           | fungal conidiogenesis and pathogenesis                    | deletion | + | + | + | + | rice (cv. CO-39) and barley (cv. Four-arris) seedlings | [312]      |
| MGG_07503 | Guy11           | <i>tpx1</i>  | thioredoxin peroxidase                        | fungal development and pathogenicity                      | deletion | - | + | + | + | rice seedlings (cv. CO-39)                             | [266]      |
| MGG_07599 | JL0910          | <i>prepl</i> | Lon/MAP1-binding protein                      | fungal development and pathogenicity                      | deletion | + | + | + | + | rice seedlings                                         | [313]      |

|           |       |               |                                     |                                                                          |          |   |   |   |   |                                    |       |
|-----------|-------|---------------|-------------------------------------|--------------------------------------------------------------------------|----------|---|---|---|---|------------------------------------|-------|
| MGG_08170 | Guy11 | <i>elf4e3</i> | translation initiation factor eIF4E | fungal development and pathogenicity, stress homeostasis                 | deletion | + | + | + | + | rice (cv. CO-39)                   | [314] |
| MGG_08203 | KU80  | <i>mbf1</i>   | multiprotein-bridging factor 1      | fungal vegetative growth, stress responses and pathogenicity             | deletion | + | - | - | + | rice (cv. Nihonbare)               | [315] |
| MGG_08345 | Guy11 | <i>cdc4</i>   | F-box protein                       | fungal development and pathogenicity                                     | deletion | + | + | + | + | barley leaves (cv. Golden Promise) | [316] |
| MGG_08387 | YN125 | <i>mcp1</i>   | cytochrome P450 oxidoreductase      | fungal development and pathogenicity, alleviating manganese toxin        | deletion | - | + | + | + | rice seedlings (cv. LTH)           | [317] |
| MGG_08623 | Guy11 | <i>gls2</i>   | glycoside hydrolase                 | asexual/sexual development and fungal pathogenicity, cell wall integrity | deletion | + | + | + | + | rice and barley leaves             | [318] |
| MGG_08737 | B157  | <i>fae</i>    | feruloyl esterase                   | host colonisation and fungal pathogenicity                               | deletion | - | - | + | + | rice, wheat or barley              | [319] |
| MGG_08829 | Ku80  | <i>tup1</i>   | general transcriptional repressor   | fungal development and virulence                                         | deletion | + | + | + | + | rice (cv. CO-39) and barley        | [320] |

|           |                |              |                                                                     |                                                                                 |                              |   |   |   |   |                                    |       |
|-----------|----------------|--------------|---------------------------------------------------------------------|---------------------------------------------------------------------------------|------------------------------|---|---|---|---|------------------------------------|-------|
| MGG_08843 | B157           | <i>alr2</i>  | CorA (Metal Ion Transporter)                                        | fungal development and pathogenicity                                            | deletion                     | + | + | + | + | rice seedling (cv. HR-12)          | [321] |
| MGG_08850 | Guy11          | <i>gti1</i>  | Gti1/Pac2 family domain-containing protein                          | fungal development and pathogenicity                                            | deletion                     | + | + | + | + | rice leaves                        | [306] |
| MGG_08861 | P131           | <i>cwf15</i> | Prp19-associated splicing factor                                    | fungal development and pathogenicity                                            | T-DNA insertion and deletion | + | + | + | + | rice (cv. LTH)                     | [322] |
| MGG_09022 | B157           | <i>wish</i>  | water wettability, infection, surface sensing and hyper-conidiation | fungal development and pathogenicity, cell wall integrity                       | deletion                     | + | + | + | + | rice (cv. HR-12)                   | [323] |
| MGG_09696 | Guy11          | <i>fwd1</i>  | F-box protein                                                       | fungal development and pathogenicity                                            | deletion                     | + | + | + | + | barley leaves (cv. Golden Promise) | [316] |
| MGG_09902 | Guy11          | <i>capb</i>  | β subunit of capping protein                                        | fungal development and pathogenicity, endocytosis and actin dynamics            | deletion                     | + | + | + | + | rice (cv. CO-39)                   | [324] |
| MGG_10422 | KJ201          | <i>afol</i>  | membrane-bound protein                                              | fungal development and pathogenicity                                            | deletion                     | - | + | + | + | rice seedlings (cv. Nakdongbye o)  | [325] |
| MGG_10492 | P131 and S1528 | <i>crc1</i>  | carnitine–acylcarnitine carrier protein                             | fungal appressorium penetration, infection hyphae development and pathogenicity | deletion                     | - | - | + | + | rice and barley seedlings          | [326] |

|           |                   |              |                                                          |                                                                                  |                                       |   |   |   |   |                                                                 |       |
|-----------|-------------------|--------------|----------------------------------------------------------|----------------------------------------------------------------------------------|---------------------------------------|---|---|---|---|-----------------------------------------------------------------|-------|
| MGG_10668 | Guy11             | <i>cgt1</i>  | ceramide<br>galactosyltransf<br>erase                    | fungus development<br>and<br>pathogenicity,<br>glucosylceramid<br>e biosynthesis | deletion                              | + | + | + | + | barley and<br>rice (cv. CO-<br>39)                              | [282] |
| MGG_11141 | JL0910            | <i>map</i>   | Magnaporthe<br>ATP-dependent<br>protease                 | appressorium<br>formation and<br>pathogenicity                                   | T-DNA<br>insertion<br>and<br>deletion | - | - | + | + | rice (cv.<br>Jijing88) and<br>barley (cv.<br>Golden<br>Promise) | [327] |
| MGG_11899 | KJ201             | <i>cdc15</i> | cell cycle gene                                          | fungus development<br>and<br>pathogenicity                                       | T-DNA<br>insertion<br>and<br>deletion | + | + | + | + | rice (cv.<br>Nakdongbye<br>o)                                   | [328] |
| MGG_12005 | 70-15             | <i>spfl</i>  | P5-type ATPase                                           | fungus development<br>and<br>pathogenicity                                       | deletion                              | + | + | + | + | barley and<br>rice (cv.<br>CO39)                                | [329] |
| MGG_12818 | Guy11             | <i>capa</i>  | $\alpha$ subunit of<br>capping protein                   | fungus development<br>and<br>pathogenicity,<br>endocytosis and<br>actin dynamics | deletion                              | + | + | + | + | rice (cv. CO-<br>39)                                            | [324] |
| MGG_13013 | P131 and<br>S1528 | <i>chs6</i>  | chitin synthase<br>gene                                  | fungus development<br>and<br>pathogenicity                                       | deletion                              | + | + | + | + | rice leaf<br>sheaths and<br>barley leaves                       | [271] |
| MGG_13530 | KV1               | <i>mca2</i>  | metacaspase                                              | fungus development<br>and<br>pathogenicity                                       | deletion                              | - | + | + | + | rice<br>seedlings<br>(cv. YT16)                                 | [294] |
| MGG_14008 | Guy11             | <i>ric8</i>  | Ric8 regulator<br>of GTP-binding<br>protein<br>signaling | fungus development<br>and<br>pathogenicity                                       | T-DNA<br>insertion<br>and<br>deletion | + | + | + | + | rice and<br>barley leaves                                       | [330] |

|           |       |              |                                                                                                       |                                                   |                                |   |   |   |   |                                           |       |
|-----------|-------|--------------|-------------------------------------------------------------------------------------------------------|---------------------------------------------------|--------------------------------|---|---|---|---|-------------------------------------------|-------|
| MGG_14014 | Guy11 | <i>plaa</i>  | phospholipase A2-activating protein                                                                   | fungal development and pathogenicity              | deletion                       | + | + | + | + | rice leaves (cultivar CO-39)              | [331] |
| MGG_14279 | Guy11 | <i>gln2</i>  | glutamine synthetase                                                                                  | fungal development and pathogenicity              | deletion                       | + | + | + | + | rice (cv. CO-39)                          | [332] |
| MGG_15203 | JJ88  | <i>ae4</i>   | bicarbonate transporter, cytomembrane and tonoplast located HCO <sub>3</sub> <sup>-</sup> transporter | fungal development and pathogenicity              | deletion                       | - | + | + | + | rice seedlings (cv. Lijiangxintu anheigu) | [333] |
| MGG_16126 | KJ201 | <i>err1</i>  | endoplasmic reticulum (ER) retention receptor 1                                                       | fungal development and pathogenicity              | T-DNA insertion and deletion   | + | + | + | + | rice (cv. Nakdong)                        | [334] |
| MGG_16212 | 70-15 | <i>fap7</i>  | ribosome assembly factor                                                                              | fungal development and pathogenicity              | deletion                       | + | + | + | + | rice seedlings                            | [335] |
| MGG_16213 | Guy11 | <i>myo5</i>  | class V myosin, interacting with SEC4                                                                 | fungal development and pathogenicity, endocytosis | deletion                       | + | + | + | + | rice leaves or barley leaves              | [336] |
| MGG_17513 | Guy11 | <i>p5cdh</i> | family four aldehyde dehydrogenases (ALDHs), delta-1-pyrrorine-5-carboxylate dehydrogenase            | fungal growth and pathogenicity                   | T-DNA insertion and knock down | + | - | - | + | rice (cv. CO-39)                          | [299] |

The studied genes are classified into 5 categories. In Supplementary Table S1f, genes that are not discussed in detail here are ordered according to their gene codes. ‘+’ in the table represents that the mutant phenotype is altered compared to WT, while ‘-’ means that the phenotype remains unchanged. NA means not assessed. The secretion signals were found using ‘SignalP-6.0’.
